# 1 Broadening a SARS-CoV-1 neutralizing antibody for potent 2 SARS-CoV-2 neutralization through directed evolution

## 3 Authors

4 Fangzhu Zhao<sup>1,2,3,10</sup>, Meng Yuan<sup>4,10</sup>, Celina Keating<sup>1,2,3,10</sup>, Namir Shaabani<sup>1,10</sup>, Oliver Limbo<sup>2,5</sup>,  
5 Collin Joyce<sup>1,2,3</sup>, Jordan Woehl<sup>2,5</sup>, Shawn Barman<sup>1,2,3</sup>, Alison Burns<sup>1,2,3</sup>, Xueyong Zhu<sup>4</sup>, Michael  
6 Ricciardi<sup>6</sup>, Linghang Peng<sup>1</sup>, Jessica Smith<sup>2,5</sup>, Deli Huang<sup>1</sup>, Bryan Briney<sup>1,3,7</sup>, Devin Sok<sup>1,2,3,5</sup>, David  
7 Nemazee<sup>1</sup>, John R. Teijaro<sup>1</sup>, Ian A. Wilson<sup>2,3,4,8</sup>, Dennis R. Burton<sup>1,2,3,9</sup>, Joseph G. Jardine<sup>2,5\*</sup>

8  
9 <sup>1</sup>Department of Immunology and Microbiology, The Scripps Research Institute, La Jolla, CA  
10 92037, USA.

11 <sup>2</sup>IAVI Neutralizing Antibody Center, The Scripps Research Institute, La Jolla, CA 92037, USA.

12 <sup>3</sup>Consortium for HIV/AIDS Vaccine Development (CHAVD), The Scripps Research Institute, La  
13 Jolla, CA 92037, USA.

14 <sup>4</sup>Department of Integrative Structural and Computational Biology, The Scripps Research Institute,  
15 La Jolla, CA 92037, USA.

16 <sup>5</sup>IAVI, New York, NY 10004, USA.

17 <sup>6</sup>Department of Pathology, George Washington University, Washington, DC 20052, USA.

18 <sup>7</sup>Center for Viral Systems Biology, The Scripps Research Institute, La Jolla, CA 92037, USA.

19 <sup>8</sup>The Skaggs Institute for Chemical Biology, The Scripps Research Institute, La Jolla, CA 92037,  
20 USA.

21 <sup>9</sup>Ragon Institute of Massachusetts General Hospital, Massachusetts Institute of Technology, and  
22 Harvard University, Cambridge, MA 02139, USA.

23 <sup>10</sup> These authors contributed equally to this work.

24 \*Correspondence: [jjardine@iavi.org](mailto:jjardine@iavi.org) (J.G.J.)

25

## 26 ABSTRACT

27 The emergence of SARS-CoV-2 underscores the need for strategies to rapidly develop  
28 neutralizing monoclonal antibodies that can function as prophylactic and therapeutic agents and  
29 to help guide vaccine design. Here, we demonstrate that engineering approaches can be used to

30 refocus an existing neutralizing antibody to a related but resistant virus. Using a rapid affinity  
31 maturation strategy, we engineered CR3022, a SARS-CoV-1 neutralizing antibody, to bind SARS-  
32 CoV-2 receptor binding domain with >1000-fold improved affinity. The engineered CR3022  
33 neutralized SARS-CoV-2 and provided prophylactic protection from viral challenge in a small  
34 animal model of SARS-CoV-2 infection. Deep sequencing throughout the engineering process  
35 paired with crystallographic analysis of an enhanced antibody elucidated the molecular  
36 mechanisms by which engineered CR3022 can accommodate sequence differences in the  
37 epitope between SARS-CoV-1 and SARS-CoV-2. The workflow described provides a blueprint  
38 for rapid broadening of neutralization of an antibody from one virus to closely related but resistant  
39 viruses.

## 40 INTRODUCTION

41 Following the emergence of severe acute respiratory syndrome coronavirus 2 (SARS-  
42 CoV-2), a massive effort was initiated to repurpose existing or discover new antibodies against  
43 SARS-CoV-2 to use as research tools, diagnostics, and as direct medical countermeasures for  
44 prophylactic and therapeutic indications. Early repurposing efforts screened monoclonal  
45 antibodies that had previously been isolated from 2003 SARS-CoV-1 (sometimes designated as  
46 SARS-CoV) and 2008 MERS-CoV survivors against SARS-CoV-2 (Tian et al., 2020), but none of  
47 the existing antibodies were able to efficiently neutralize this novel virus. In parallel, multiple  
48 groups worked to isolate antibodies from SARS-CoV-2 infected humans or from animals  
49 immunized with SARS-CoV-2 spike (S) proteins (Hansen et al., 2020; Ju et al., 2020; Pinto et al.,  
50 2020; Robbiani et al., 2020; Rogers et al., 2020; Wrapp et al., 2020). Although various approaches  
51 were used in the antibody discovery process, most utilized an antigen-specific B cell sorting  
52 strategy to isolate binding antibodies followed by an *in vitro* neutralization assay to identify the  
53 neutralizing subset. This antibody discovery process has been widely used to identify HIV  
54 neutralizing antibodies and extensively refined and streamlined over the last decade to the point  
55 where it is possible to progress from biological samples to recombinantly produced antibodies  
56 ready for validation in 1-2 weeks (Huang et al., 2013, 2014; Rogers et al., 2020; Sok et al., 2014).  
57 The two major bottlenecks in this process currently are: 1) access to high quality peripheral blood  
58 mononuclear cell (PBMC) samples for antigen-specific B cell sorting and 2) the identification of  
59 lead therapeutic candidates that have both the desired neutralization function and biochemical  
60 developability properties that are amenable to large-scale manufacturing and formulation. Access  
61 to PBMCs was particularly onerous in the very early stages of the COVID-19 outbreak when donor

62 samples were not available in the United States and Europe because of shipping and/or biosafety  
63 restrictions.

64 Here we explore a hybrid “refocusing” approach that is a blend between conventional  
65 discovery and repurposing, where an existing neutralizing antibody is engineered to target a  
66 related, but resistant virus. As a case study, we selected CR3022, a SARS-CoV-1 neutralizing  
67 monoclonal antibody isolated in 2006 from a convalescent donor (ter Meulen et al., 2006). At the  
68 onset of the pandemic, CR3022 received considerable attention because it was shown to cross-  
69 react with SARS-CoV-2 (Tian et al., 2020). Several groups tested whether CR3022 could  
70 neutralize SARS-CoV-2, and most observed either no neutralization or only partial neutralization  
71 at the highest antibody concentration (Anand et al., 2020; Atyeo et al., 2021; Manenti et al., 2020;  
72 Wu et al., 2020b; Yuan et al., 2020a; Zhou et al., 2020), although one group did report neutralizing  
73 activity in their assay (Huo et al., 2020). A crystal structure revealed that CR3022 recognizes an  
74 epitope outside of the ACE2 binding site that is highly conserved between SARS-CoV-1 and  
75 SARS-CoV-2 (Yuan et al., 2020a) with only four amino acid differences located in or around the  
76 CR3022 epitope. Reversion of one of these four mutations, P384A, was shown to be responsible  
77 for the 100-fold reduction in binding affinity for CR3022 to the novel SARS-CoV-2 (Wu et al.,  
78 2020a). These findings are consistent with other documented examples of viral escape from  
79 neutralizing antibodies (nAbs), where small changes in the antibody epitope are sufficient to  
80 reduce antibody binding below the requisite threshold to achieve effective neutralization (Bates  
81 et al., 2014). To address this, we wanted to explore whether engineering approaches can be used  
82 to retarget the SARS-CoV-1 nAb CR3022 to the corresponding epitope on SARS-CoV-2.

## 83 **RESULTS**

### 84 **Engineering of SARS-CoV-1 nAb CR3022 to efficiently recognize SARS-CoV-2**

85 To engineer CR3022 variants with higher affinity for SARS-CoV-2 S protein, we utilized a  
86 rapid antibody affinity maturation strategy that we developed called **S**ynthetic **A**ntibody **M**aturation  
87 by multiple **P**oint **L**oop library **E**n**R**ichments (SAMPLER). Libraries are generated around a  
88 starting antibody sequence by introducing single mutations within the complementarity-  
89 determining region (CDR) loops. These variant libraries are then displayed on the surface of yeast  
90 as molecular Fab and screened with fluorescence-activated cell sorting (FACS) to isolate clones  
91 with improved affinity for the target antigen (Figure 1A). During the library generation, the diversity  
92 is introduced into the CDR loops using predefined oligo pools (Li et al., 2018), where each

93 mutation is explicitly synthesized so the library is free of unwanted mutations like cysteines or  
94 methionines and mutations that would introduce N-linked glycan motifs. Each CDR loop library  
95 contains 100-200 unique variants, depending on the length of the loop, and when the CDR1/2/3  
96 libraries are combined, the resulting combinatorial library contains 3-4 million unique sequences,  
97 each with up to 3 mutations from the parental CR3022 heavy chain (HC) or light chain (LC)  
98 sequence (Figure 1A). This strategy efficiently samples a large theoretical search space around  
99 the starting antibody sequence and allows for the screening of synergistic mutations between  
100 CDR loops, as it has been shown that affinity enhancing mutations can be destabilizing and  
101 require compensatory stabilizing mutations (Julian et al., 2017). Overall, this rational CDR  
102 synthesis reduces the theoretical diversity by 6-fold compared to using NNK by removing the  
103 redundancy of the overrepresented amino acids and removing unwanted mutations (Table S1).

104 Initially, two libraries were generated—one library with mutations in the HC paired with  
105 unmodified LC (HC library) and one library with mutations in the LC that was paired with the  
106 unmodified HC (LC library) and displayed on the surface of yeast (Figure 1A). Each library was  
107 sorted four times against SARS-CoV-2 receptor binding domain (RBD) to enrich for variants with  
108 higher affinity for the protein (Figure S1). In sorts 1, 2 and 4, cells were labeled with non-saturating  
109 concentrations of biotinylated SARS-CoV-2 RBD and the top 5-10% of RBD-binding cells,  
110 normalized for Fab surface display, were collected to enrich for HC or LC sequences with  
111 increased affinity for SARS-CoV-2 RBD (Figure S2). In sort 3, a negative selection was used to  
112 deplete polyreactive clones, where cells were labeled with a biotinylated preparation of detergent  
113 solubilized HEK293 membrane proteins (Figure S1) (Xu et al., 2013). After the four selections,  
114 the antibody display vectors from the HC and LC libraries were harvested and the region encoding  
115 the heavy and light chain was amplified and combined into a new combinatorial heavy and light  
116 chain library (H/L library) that sampled diversity in both chains (Figure 1A). The H/L library was  
117 screened with the same four-round selection protocol to identify the optimal combination of  
118 mutations in the heavy and light chains. In total, it took just under one month to complete all three  
119 rounds of SAMPLER optimization (Figure S1).

120 Following each round of SARS-CoV-2 selection, plasmid DNA encoding the HC and LC  
121 regions was amplified and deep sequenced. The HC library showed a strong preference for an  
122 S55G mutation (Kabat numbering) in CDRH2, appearing in 57% of sequences after sort 1 and  
123 98% of sequences after sort 4 (Figure 1B). In CDRH3, an S96G mutation was observed in 36%  
124 of sequences. The mutations in CDRH1 were largely localized to the F29 and T31 positions, with  
125 65% and 33% enriched mutation frequency respectively, but multiple mutations were allowed at  
126 each one of those positions. The LC library showed strong enrichment for a tyrosine to tryptophan

127 mutation at position Y27<sub>d</sub> residue in CDRL1, enriching to 52% of the total reads after sort 4 (Figure  
128 1B). CDRL2 and CDRL3 showed no strong enrichments across any of the selections.

129 In the combinatorial H/L library, three mutations were further enriched in CR3022 HC: 98%  
130 T31W in CDRH1, 99% of S55G in CDRH2, and 100% S96G in CDRH3 (Figure S3). Nevertheless,  
131 the LC remained more diverse in the H/L library, with the Y to W mutation further enriched to 71%  
132 of the population at the Y27<sub>d</sub> position (Figure S3). In addition to deep sequencing of the individual  
133 chains, PacBio sequencing was used to evaluate the recovered heavy/light pairs from sort 4. The  
134 overall frequencies of mutations closely matched what was observed in the individual chains, with  
135 a high degree of convergence on the heavy chain and a significant level of diversity still present  
136 in the light chain, with no clear evidence of evolutionary coupling within the selected H/L chain  
137 pairings (Figure 1C).

### 138 **Binding and neutralizing activity of eCR3022 for SARS-CoV-2**

139 From the sequences recovered after the final H/L library sort, we selected 25 engineered  
140 CR3022 antibodies, named engineered (e) eCR3022.1 through eCR3022.25, to reformat for  
141 expression as human IgG1 for in-depth characterization. Because of the nature of how the H/L  
142 library was constructed and the fact that there was more observed convergence in the HC, the  
143 selected variants utilized only 5 unique HCs, while all 25 LCs were unique (Table S2). The  
144 affinities for SARS-CoV-1 RBD of all eCR3022 Abs remained the same or slightly improved  
145 compared to the parental CR3022, despite not having been included in the optimization process  
146 (Figures 2A, 2B; Table S2). The binding affinities of all eCR3022 antibodies against monomeric  
147 SARS-CoV-2 RBD increased between 100 to 1000-fold compared to the parental CR3022 by  
148 surface plasmon resonance (SPR), with equilibrium dissociation constant ( $K_D$ ) values ranging  
149 from 16 pM to 312 pM (Figures 2A, 2C; Table S2). The on-rate of the antibodies was nearly the  
150 same as the parental CR3022, with the affinity increases coming through a reduction in the  
151 antibody off-rate (Figure 2C, Table S2). The ELISA binding activities of the eCR3022 variants  
152 against SARS-CoV-2 S and RBD were also improved (Figure S4), showing that this increased  
153 binding to SARS-CoV-2 RBD also translated to the functional S protein. All engineered antibodies  
154 showed negligible polyreactive binding across our nonspecific antigen panels (Figure S5A, S5B)  
155 and were monodispersed with analytical SEC column retention times similar to other clinical mAbs  
156 (Figure S5C), indicating the engineering had minimal impact on the favorable biochemical  
157 properties of the parental CR3022.

158 To evaluate the effect of the affinity gains on antibody neutralization, CR3022 and all 25  
159 eCR3022 variants were tested using an MLV-based pseudovirus system (Rogers et al., 2020).

160 All variants showed enhanced neutralization of SARS-CoV-1, with the most potent neutralizing at  
161 0.5  $\mu\text{g}/\text{mL}$  compared to the parental CR3022 that neutralizes at 10.9  $\mu\text{g}/\text{mL}$  (Figures 2D, 2E). In  
162 our assay, CR3022 failed to neutralize SARS-CoV-2 at a maximum antibody concentration of 100  
163  $\mu\text{g}/\text{mL}$  (Figures 2D, 2F). In contrast, all eCR3022 antibodies were able to neutralize pseudotyped  
164 SARS-CoV-2 with a median  $\text{IC}_{50}$  of 1.6  $\mu\text{g}/\text{mL}$ , with the most potent neutralizing SARS-CoV-2  
165 exhibiting an  $\text{IC}_{50}$  of 0.3  $\mu\text{g}/\text{mL}$  (Figures 2D, 2F). We further tested the neutralization activity of  
166 eCR3022.7, eCR3022.10 and eCR3022.20 against the emerging variants of concern B.1.1.7 (with  
167 N501Y mutation on RBD) and B.1.351 (with K417N, E484K, N501Y mutations on RBD) variants  
168 (Tegally et al.), where the mutations are located in the receptor binding site on the RBD and are  
169 outside the CR3022 epitope. As expected, eCR3022 antibodies neutralized both viral variants  
170 with similar  $\text{IC}_{50}$  to the wildtype virus SARS-CoV-2 (Figure S6). Lastly, the eCR3022 variants were  
171 able to neutralize authentic SARS-CoV-2 virus while CR3022 failed to neutralize, confirming the  
172 neutralization against authentic virus (Figure S7).

### 173 **Structural analysis of eCR3022.20 complexed to SARS-CoV-2 RBD**

174 To understand the molecular features of the affinity-matured eCR3022 antibodies that  
175 confer potent neutralization against SARS-CoV-2, we determined a crystal structure of  
176 eCR3022.20 in complex with SARS-CoV-2 RBD and Fab CC12.3 (Yuan et al., 2020b) (to aid in  
177 crystallization) to 2.85 Å resolution and compared its binding with CR3022 (Yuan et al., 2020a)  
178 (Figure 3A; Figure S8; Table S3). Two copies of the eCR3022.20–RBD–CC12.3 complex were  
179 found in the crystal asymmetric unit. eCR3022.20 binds SARS-CoV-2 RBD via the same epitope  
180 as CR3022 through a nearly identical angle of approach (Yuan et al., 2020a) (Figure 3A).  
181 Furthermore, the RBD conformation bound by both antibodies are almost identical, except for two  
182 regions of the RBD (residues 365-370 and 384-390) that are displaced in eCR3022.20 compared  
183 to CR3022 (Figure 3B). However, residues in both of these regions (RBD-Y369, F377, and P384)  
184 form a hydrophobic pocket that interact with CDRH1 of these antibodies (Figures 3C-3F).  $V_{\text{H}}$  T31  
185 in CDRH1 of CR3022 (Figure 3C) is substituted by a bulky hydrophobic, aromatic residue W31,  
186 which stacks with RBD residues Y369, F377, and P384 and strengthens the interaction with this  
187 hydrophobic pocket in the RBD (Figures 3D, 3E). The T31W substitution induces a 2.4-Å shift in  
188 the RBD around residues 365-370, as well as a 1.4-Å shift of residues 384-390 (Figure 3F).  
189 Previously, we showed that residue 384 is an important epitope residue for CR3022 binding,  
190 where a P384A mutation conferred an approximate 100-fold affinity improvement for CR3022 (Wu  
191 et al., 2020a). Here, we show that a substitute paratope residue targeting this area of the epitope

192 is able to contribute to an improvement in antibody binding and further highlights the importance  
193 of P384 as a key epitope residue for CR3022.

194 In addition to CDRH1, CDRH2 of both CR3022 and eCR3022.20 interact with SARS-CoV-  
195 2 RBD (Figures 3G, 3H). For both antibodies, V<sub>H</sub> Y52 forms a hydrogen bond with the backbone  
196 amide of RBD-F377. V<sub>H</sub> D54 and E56 clamp onto RBD-K378 with two salt bridges (Figures 3G,  
197 3H). CDRH2 in both antibodies form a type-IV  $\beta$  (Lewis et al., 1973) at the CDR tip, where V<sub>H</sub> S55  
198 (i+3) in CR3022 is substituted by a glycine in most sorted antibody variants during the process of  
199 affinity maturation (Figure 1B; Figure S9). Glycine is frequently found in  $\beta$  turns due to the lack of  
200 a side chain that allows higher conformational flexibility. Indeed, glycine is the most frequent  
201 residue at the i+3 position of a type-IV  $\beta$  turn, suggesting that it is energetically favored at this  
202 position as it can also more readily adopt a positive phi value as found here compared to S55  
203 (Guruprasad and Rajkumar, 2000). For the light-chain residues, V<sub>L</sub> Y31 and S99 are mutated to  
204 W31 and K99 in eCR3022.20 (Figures 3I, 3J). While V<sub>L</sub> W31 retains hydrophobic interactions with  
205 RBD-Y380, P412, and F429, V<sub>L</sub> K99 is able to form a cation- $\pi$  interaction with W31, which  
206 stabilizes the interaction between CDRs L1 and L3 and may reduce the entropy of its interaction  
207 with the RBD.

## 208 **Protection by eCR3022 against SARS-CoV-2 challenge in a small animal model**

209 Upon developing a CR3022 variant capable of neutralizing SARS-CoV-2, we sought to  
210 evaluate whether this engineered antibody could provide prophylactic protection against viral  
211 challenge in the Syrian hamster model. Based on the neutralization and biophysical data,  
212 eCR3022.7 was selected as our initial candidate antibody to evaluate. Groups of six hamsters  
213 received an intraperitoneal infusion 10 mg, 2 mg, 0.5 mg, or 0.125 mg of eCR3022.7 per animal  
214 to evaluate dose-dependent protection. Another group received 10 mg of the parental CR3022  
215 antibody and a control group received 10 mg of an anti-dengue isotype matched antibody. Three  
216 days post infusion, sera were collected from each animal to determine antibody titer at the time  
217 of viral challenge. Animals were then challenged with  $1 \times 10^5$  plaque forming units (PFU) of SARS-  
218 CoV-2 (USA-WA1/2020) by intranasal administration. The hamsters were weighed daily as a  
219 measure of disease due to infection and sera were collected from all animals at the conclusion of  
220 the experiment on day 7. Hamsters have been shown to clear SARS-CoV-2 infection after 7 days  
221 (Sia et al., 2020), so a replicate of the original experiment was performed with six additional  
222 animals in which lung tissue was collected on day 4 to accurately measure replicative viral load  
223 amongst the groups (Figure 4A).

224           The groups receiving the highest doses of eCR3022.7 of 10 mg or 2 mg were largely  
225 protected from viral challenge, exhibiting either no weight loss or 3% weight loss, respectively, at  
226 the end of the 7-day experiment (Figure 4B; Figure S10). In contrast, the group that received 10  
227 mg of the original CR3022 antibody lost 11% of body weight, comparable to the control group that  
228 received 10 mg of Den3. The groups that received 0.5 mg or 0.125 mg eCR3022.7 on average  
229 lost slightly less weight than the control group but the difference was not significant (Table S4).  
230 Lung viral titers were assessed from the second group of animals by plaque assay (Figure 4C).  
231 Equivalent viral loads were measured between the control Den3 and original CR3022 groups with  
232 average of  $4.0 \times 10^6$  PFU/mL and  $6.8 \times 10^5$  PFU/mL, respectively (Table S4). In contrast, the  
233 groups that received 10 mg or 2 mg doses of eCR3022.7 had  $7.0 \times 10^4$  PFU/mL and  $8.7 \times 10^4$   
234 PFU/mL, respectively, more than 2 logs lower than the Den3 control. The reduced SARS-CoV-2  
235 viral lung titers and maintenance of body weight following challenge in the animals receiving either  
236 10 mg or 2 mg doses prophylactically of eCR3022.7 demonstrate that the *in vitro* neutralization  
237 potency translates to *in vivo* protection. Serum antibody concentrations were measured both at  
238 the time of challenge and the end of the study. The 10 mg eCR3022.7 and 10 mg CR3022 groups  
239 had an equivalent amount of antibody present at the time of injection as well as equivalent decay  
240 by day 7, confirming that the observed protection differences are not attributable to different  
241 pharmacokinetic properties of the two antibodies (Figure 4D, Figure S10B).

## 242 **DISCUSSION**

243           Antibody refocusing serves as a novel approach to generate neutralizing antibodies  
244 against novel viruses or viral variants, provided that a neutralizing antibody against a closely  
245 related virus is available. In this case study, we successfully re-engineered a SARS-CoV-1 nAb,  
246 CR3022, so that it now potently neutralized both SARS-CoV-1 and SARS-CoV-2. eCR3022  
247 variants with >1000-fold enhanced affinity for SARS-CoV-2 RBD were generated while  
248 maintaining their biochemically favorable developability profile. The enhanced affinity conferred  
249 the ability to potently neutralize SARS-CoV-2 and protect from viral challenge in a small animal  
250 model. In fact, the eCR3022 variants now neutralize SARS-CoV-2 more potently than the parental  
251 CR3022 neutralizes SARS-CoV-1. These findings are consistent with previous studies showing  
252 a relationship between antibody/antigen binding affinity for S protein and neutralization potency.  
253 However, this is the first instance that we are aware of where an antibody has been specifically  
254 retargeted or optimized to a novel related virus. Although this refocusing strategy likely will not be  
255 effective when the antibody epitope is substantially different between viruses (Figure S11), the



256 potential pool of starting antibodies continues to expand as more neutralizing antibodies are  
257 discovered against different viruses. We also note that the use of on-chip DNA synthesis to  
258 rationally produce the CDR libraries used in our SAMPLER optimization allowed us to efficiently  
259 cover a large portion of the theoretical search space within the antibody paratope, effectively  
260 achieving these affinity gains in a two-step process. Given that the affinity engineering described  
261 can be done in less than one month and does not require access to PBMC samples from  
262 immunized or infected donors or structural information on the antibody/antigen interaction, the  
263 approach could be used in conjunction with conventional antibody discovery as a rapid response  
264 to future outbreaks of pandemic concern.

265

## 266 REFERENCES

- 267 Adams, P.D., Afonine, P.V., Bunkóczi, G., Chen, V.B., Davis, I.W., Echols, N., Headd, J.J.,  
268 Hung, L.-W., Kapral, G.J., Grosse-Kunstleve, R.W., et al. (2010). PHENIX: a comprehensive  
269 Python-based system for macromolecular structure solution. *Acta Crystallogr. Sect. D, Biol.*  
270 *Crystallogr.* *66*, 213–221.
- 271 Anand, S.P., Chen, Y., Prévost, J., Gasser, R., Beaudoin-Bussièeres, G., Abrams, C.F., Pazgier,  
272 M., and Finzi, A. (2020). Interaction of Human ACE2 to Membrane-Bound SARS-CoV-1 and  
273 SARS-CoV-2 S Glycoproteins. *Viruses* *12*, 1104.
- 274 Atyeo, C., Slein, M.D., Fischinger, S., Burke, J., Schäfer, A., Leist, S.R., Kuzmina, N.A., Mire,  
275 C., Honko, A., Johnson, R., et al. (2021). Dissecting strategies to tune the therapeutic potential  
276 of SARS-CoV-2-specific monoclonal antibody CR3022. *JCI Insight* *6*, e143129.
- 277 Bates, J.T., Keefer, C.J., Slaughter, J.C., Kulp, D.W., Schief, W.R., and Crowe, J.E. (2014).  
278 Escape from neutralization by the respiratory syncytial virus-specific neutralizing monoclonal  
279 antibody palivizumab is driven by changes in on-rate of binding to the fusion protein. *Virology*  
280 *454–455*, 139–144.
- 281 Bushnell, B., Rood, J., and Singer, E. (2017). BBMerge - accurate paired shotgun read merging  
282 via overlap. *PLoS One* *12*, e0185056.
- 283 Crooks, G.E., Hon, G., Chandonia, J.M., and Brenner, S.E. (2004). WebLogo: a sequence logo  
284 generator. *Genome Res.* *14*, 1188–1190.
- 285 Emsley, P., Lohkamp, B., Scott, W.G., and Cowtan, K. (2010). Features and development of  
286 Coot. *Acta Crystallogr. Sect. D, Biol. Crystallogr.* *66*, 486–501.
- 287 Guruprasad, K., and Rajkumar, S. (2000). Beta-and gamma-turns in proteins revisited: a new  
288 set of amino acid turn-type dependent positional preferences and potentials. *J. Biosci.* *25*, 143–

289 156.

290 Hansen, J., Baum, A., Pascal, K.E., Russo, V., Giordano, S., Wloga, E., Fulton, B.O., Yan, Y.,  
291 Koon, K., Patel, K., et al. (2020). Studies in humanized mice and convalescent humans yield a  
292 SARS-CoV-2 antibody cocktail. *Science* 369, 1010–1014.

293 Huang, J., Doria-Rose, N.A., Longo, N.S., Laub, L., Lin, C.-L., Turk, E., Kang, B.H., Migueles,  
294 S.A., Bailer, R.T., Mascola, J.R., et al. (2013). Isolation of human monoclonal antibodies from  
295 peripheral blood B cells. *Nat. Protoc.* 8, 1907–1915.

296 Huang, J., Kang, B.H., Pancera, M., Lee, J.H., Tong, T., Feng, Y., Imamichi, H., Georgiev, I.S.,  
297 Chuang, G.-Y., Druz, A., et al. (2014). Broad and potent HIV-1 neutralization by a human  
298 antibody that binds the gp41-gp120 interface. *Nature* 515, 138–142.

299 Huo, J., Zhao, Y., Ren, J., Zhou, D., Duyvesteyn, H.M.E., Ginn, H.M., Carrique, L., Malinauskas,  
300 T., Ruza, R.R., Shah, P.N.M., et al. (2020). Neutralization of SARS-CoV-2 by Destruction of the  
301 Prefusion Spike. *Cell Host Microbe* 28, 497.

302 Ju, B., Zhang, Q., Ge, J., Wang, R., Sun, J., Ge, X., Yu, J., Shan, S., Zhou, B., Song, S., et al.  
303 (2020). Human neutralizing antibodies elicited by SARS-CoV-2 infection. *Nature* 584, 115–119.

304 Julian, M.C., Li, L., Garde, S., Wilen, R., and Tessier, P.M. (2017). Efficient affinity maturation of  
305 antibody variable domains requires co-selection of compensatory mutations to maintain  
306 thermodynamic stability. *Sci. Rep.* 7, 45259.

307 Krissinel, E., and Henrick, K. (2007). Inference of macromolecular assemblies from crystalline  
308 state. *J. Mol. Biol.* 372, 774–797.

309 Lan, J., Ge, J., Yu, J., Shan, S., Zhou, H., Fan, S., Zhang, Q., Shi, X., Wang, Q., Zhang, L., et  
310 al. (2020). Structure of the SARS-CoV-2 spike receptor-binding domain bound to the ACE2  
311 receptor. *Nature* 581, 215–220.

312 Lewis, P.N., Momany, F.A., and Scheraga, H.A. (1973). Chain reversals in proteins. *Biochimica*  
313 *et Biophysica Acta (BBA) - Protein Structure* 303, 211–229.

314 Li, A., Acevedo-Rocha, C.G., Sun, Z., Cox, T., Xu, J.L., and Reetz, M.T. (2018). Beating Bias in  
315 the Directed Evolution of Proteins: Combining High-Fidelity on-Chip Solid-Phase Gene  
316 Synthesis with Efficient Gene Assembly for Combinatorial Library Construction. *ChemBiochem*  
317 19, 221–228.

318 Manenti, A., Maggetti, M., Casa, E., Martinuzzi, D., Torelli, A., Trombetta, C.M., Marchi, S., and  
319 Montomoli, E. (2020). Evaluation of SARS-CoV-2 neutralizing antibodies using a CPE-based  
320 colorimetric live virus micro-neutralization assay in human serum samples. *J. Med. Virol.* 92,  
321 2096–2104.

322 McCoy, A.J., Grosse-Kunstleve, R.W., Adams, P.D., Winn, M.D., Storoni, L.C., and Read, R.J.  
323 (2007). Phaser crystallographic software. *J Appl Crystallogr* 40, 658–674.

324 ter Meulen, J., van den Brink, E.N., Poon, L.L.M., Marissen, W.E., Leung, C.S.W., Cox, F.,  
325 Cheung, C.Y., Bakker, A.Q., Bogaards, J.A., van Deventer, E., et al. (2006). Human monoclonal  
326 antibody combination against SARS coronavirus: synergy and coverage of escape mutants.  
327 *PLoS Med.* 3, e237.

328 Otwinowski, Z., and Minor, W. (1997). Processing of X-ray diffraction data collected in oscillation  
329 mode. *Meth. Enzymol.* 276, 307–326.

330 Pinto, D., Park, Y.-J., Beltramello, M., Walls, A.C., Tortorici, M.A., Bianchi, S., Jaconi, S., Culap,  
331 K., Zatta, F., De Marco, A., et al. (2020). Cross-neutralization of SARS-CoV-2 by a human  
332 monoclonal SARS-CoV antibody. *Nature* 583, 290–295.

333 Robbiani, D.F., Gaebler, C., Muecksch, F., Lorenzi, J.C.C., Wang, Z., Cho, A., Agudelo, M.,  
334 Barnes, C.O., Gazumyan, A., Finkin, S., et al. (2020). Convergent antibody responses to SARS-  
335 CoV-2 in convalescent individuals. *Nature* 584, 437–442.

336 Rogers, T.F., Zhao, F., Huang, D., Beutler, N., Burns, A., He, W.-T., Limbo, O., Smith, C., Song,  
337 G., Woehl, J., et al. (2020). Isolation of potent SARS-CoV-2 neutralizing antibodies and  
338 protection from disease in a small animal model. *Science* 369, 956–963.

339 Rognes, T., Flouri, T., Nichols, B., Quince, C., and Mahé, F. (2016). VSEARCH: a versatile  
340 open source tool for metagenomics. *PeerJ* 4, e2584.

341 Sia, S.F., Yan, L.-M., Chin, A.W.H., Fung, K., Choy, K.-T., Wong, A.Y.L., Kaewpreedee, P.,  
342 Perera, R.A.P.M., Poon, L.L.M., Nicholls, J.M., et al. (2020). Pathogenesis and transmission of  
343 SARS-CoV-2 in golden hamsters. *Nature* 583, 834–838.

344 Sok, D., van Gils, M.J., Pauthner, M., Julien, J.-P., Saye-Francisco, K.L., Hsueh, J., Briney, B.,  
345 Lee, J.H., Le, K.M., Lee, P.S., et al. (2014). Recombinant HIV envelope trimer selects for  
346 quaternary-dependent antibodies targeting the trimer apex. *Proc. Natl. Acad. Sci. USA* 111,  
347 17624–17629.

348 Tegally, H., Wilkinson, E., Giovanetti, M., Iranzadeh, A., Fonseca, V., Giandhari, J., Doolabh,  
349 D., Pillay, S., San, E.J., Msomi, N., et al. Detection of a SARS-CoV-2 variant of concern in  
350 South Africa. *Nature* 592, 438–443.

351 Tian, X., Li, C., Huang, A., Xia, S., Lu, S., Shi, Z., Lu, L., Jiang, S., Yang, Z., Wu, Y., et al.  
352 (2020). Potent binding of 2019 novel coronavirus spike protein by a SARS coronavirus-specific  
353 human monoclonal antibody. *Emerg. Microbes Infect.* 9, 382–385.

354 Wang, B., DeKosky, B.J., Timm, M.R., Lee, J., Normandin, E., Misasi, J., Kong, R., McDaniel,

355 J.R., Delidakis, G., Leigh, K.E., et al. (2018). Functional interrogation and mining of natively  
356 paired human VH:VL antibody repertoires. *Nat. Biotechnol.* *36*, 152–155.

357 Wrapp, D., De Vlieger, D., Corbett, K.S., Torres, G.M., Wang, N., Van Breedam, W., Roose, K.,  
358 van Schie, L., VIB-CMB COVID-19 Response Team, Hoffmann, M., et al. (2020). Structural  
359 Basis for Potent Neutralization of Betacoronaviruses by Single-Domain Camelid Antibodies. *Cell*  
360 *181*, 1004–1015.e15.

361 Wu, N.C., Yuan, M., Bangaru, S., Huang, D., Zhu, X., Lee, C.-C.D., Turner, H.L., Peng, L.,  
362 Yang, L., Burton, D.R., et al. (2020a). A natural mutation between SARS-CoV-2 and SARS-CoV  
363 determines neutralization by a cross-reactive antibody. *PLoS Pathog.* *16*, e1009089.

364 Wu, Y., Li, C., Xia, S., Tian, X., Kong, Y., Wang, Z., Gu, C., Zhang, R., Tu, C., Xie, Y., et al.  
365 (2020b). Identification of Human Single-Domain Antibodies against SARS-CoV-2. *Cell Host*  
366 *Microbe* *27*, 891–898.e5.

367 Xu, Y., Roach, W., Sun, T., Jain, T., Prinz, B., Yu, T.-Y., Torrey, J., Thomas, J., Bobrowicz, P.,  
368 Vásquez, M., et al. (2013). Addressing polyspecificity of antibodies selected from an in vitro  
369 yeast presentation system: a FACS-based, high-throughput selection and analytical tool. *Protein*  
370 *Eng Des Sel* *26*, 663–670.

371 Yuan, M., Wu, N.C., Zhu, X., Lee, C.-C.D., So, R.T.Y., Lv, H., Mok, C.K.P., and Wilson, I.A.  
372 (2020a). A highly conserved cryptic epitope in the receptor binding domains of SARS-CoV-2  
373 and SARS-CoV. *Science* *368*, 630–633.

374 Yuan, M., Liu, H., Wu, N.C., Lee, C.-C.D., Zhu, X., Zhao, F., Huang, D., Yu, W., Hua, Y., Tien,  
375 H., et al. (2020b). Structural basis of a shared antibody response to SARS-CoV-2. *Science* *369*,  
376 1119–1123.

377 Zhou, T., Tsybovsky, Y., Gorman, J., Rapp, M., Cerutti, G., Chuang, G.-Y., Katsamba, P.S.,  
378 Sampson, J.M., Schön, A., Bimela, J., et al. (2020). Cryo-EM Structures of SARS-CoV-2 Spike  
379 without and with ACE2 Reveal a pH-Dependent Switch to Mediate Endosomal Positioning of  
380 Receptor-Binding Domains. *Cell Host Microbe* *28*, 867–879.e5.

381

## 382 **ACKNOWLEDGEMENTS**

383 We thank Laurence Cagnon at The Scripps Research Institute for coordinating with BSL-3  
384 experiments. We thank Scripps Genomic Core facility for the help of deep sequencing. We thank  
385 Raiees Andrabi at The Scripps Research Institute for providing SARS-CoV-1 S protein. This work

386 was partially funded by IAVI with the generous support of USAID and other donors; a full list of  
387 IAVI donors is available at [www.iavi.org](http://www.iavi.org). This work was supported by the Bill and Melinda Gates  
388 Foundation OPP1170236 and INV-004923 INV (I.A.W., D.R.B.). D.H. and D.N. were supported  
389 by R01AI132317. Use of the SSRL, SLAC National Accelerator Laboratory, is supported by the  
390 U.S. Department of Energy, Office of Science, Office of Basic Energy Sciences under Contract  
391 No. DE-AC02-76SF00515. The SSRL Structural Molecular Biology Program is supported by the  
392 DOE Office of Biological and Environmental Research, and by the National Institutes of Health,  
393 National Institute of General Medical Sciences (including P41GM103393).

## 394 **AUTHOR CONTRIBUTIONS**

395 F.Z., C.K., J.G.J. designed the experiments. J.G.J. designed the synthetic antibody library, F.Z.,  
396 S.B. and M.J.R. performed the yeast library display and FACS selection. F.Z. and S.B. prepped  
397 the yeast library DNA and deep sequenced. J.S. analyzed the deep sequencing results and C.J.  
398 analyzed the PacBio sequencing results. F.Z., O.L., S.B., and A.B. expressed and purified the  
399 antibodies. J.W. performed the SPR assay. F.Z., O.L. S.B., and A.B. carried out the pseudovirus  
400 neutralization assays. S.P. and D.H. generated SARS-CoV-2 mutant virus constructs. N.S and  
401 D.H. performed authentic SARS-CoV-2 neutralization assay. M.Y. and O.L. expressed and  
402 purified the recombinant SARS-CoV-2 S and RBD proteins. F.Z., S.B. A.B. performed binding  
403 assays, and biophysical analysis assays. M.Y., X.Z., and I.A.W. crystallized eCR3022.20 and  
404 performed structure determination and analysis. C.K. and N.S. performed the hamster protection  
405 study and measured the viral load. F.Z., M.Y., C.K., I.A.W., D.R.B. and J.G.J. wrote the  
406 manuscript, and all authors reviewed and edited the manuscript.

## 407 Main Text Figures

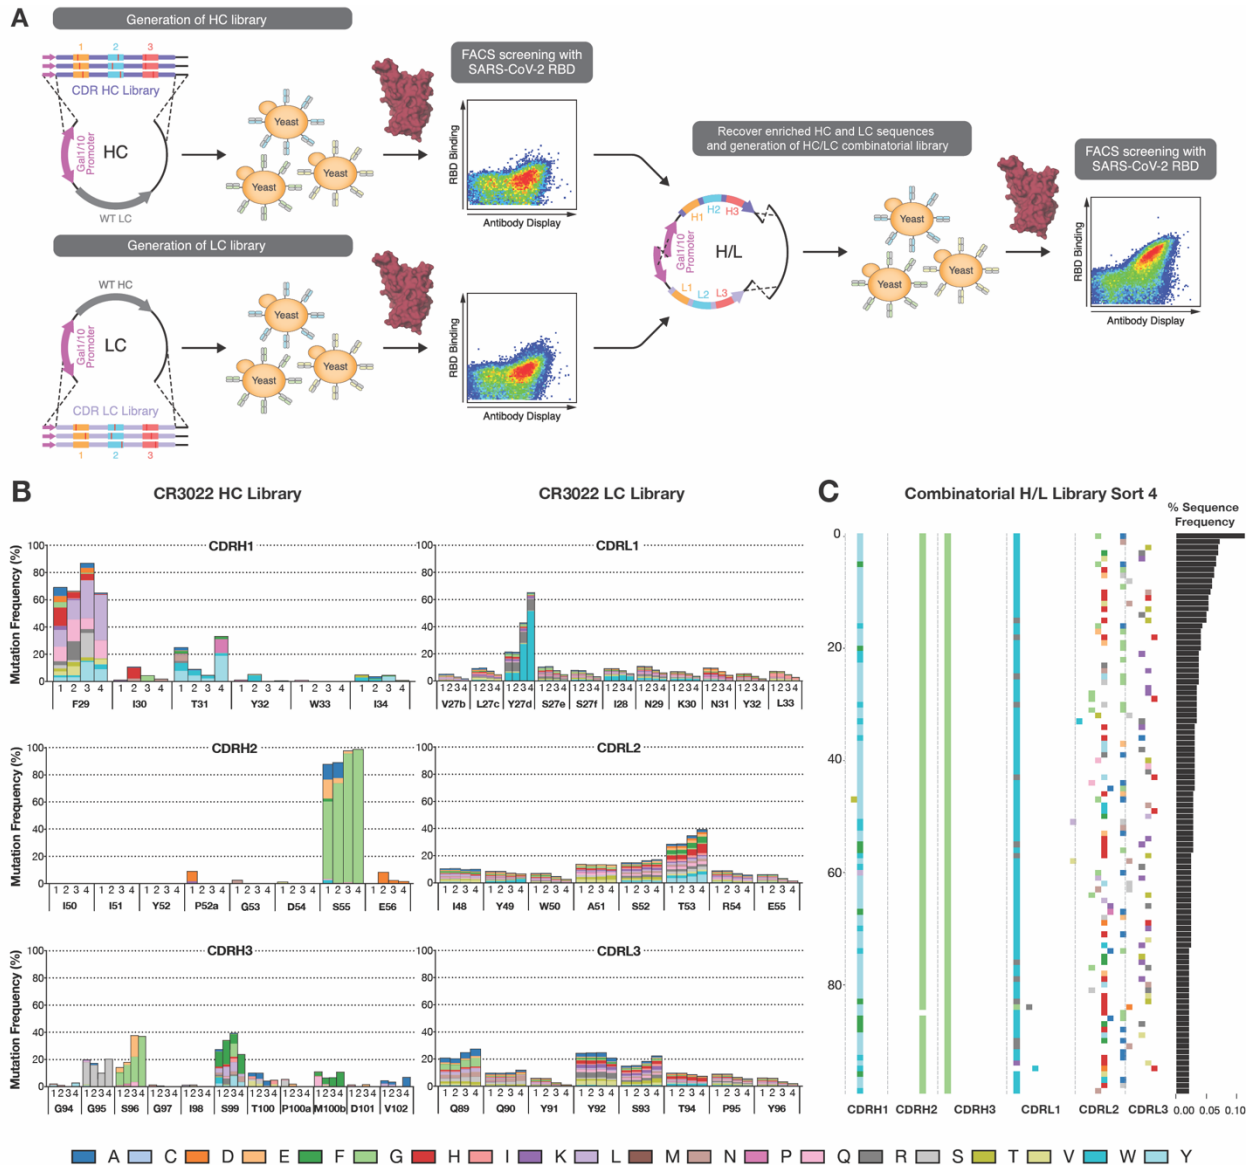

408

409

410 **Figure 1. Engineering CR3022 to increase binding affinity to SARS-CoV-2 RBD using**

411 **SAMPLER (A)** A synthetic CR3022 antibody library with single mutation at each CDR loop was

412 displayed as molecular Fab on the surface of yeast cells. The CR3022 HC library with up to three

413 mutations was paired with the original LC while LC library was paired with the original HC. After

414 FACS selection by SARS-CoV-2 RBD, the HC library and LC library were amplified and combined

415 into combinatorial H/L library and further selected for high binding clones by SARS-CoV-2 RBD.

416 Enriched clones with high binding affinities were reformatted and expressed as human IgG. **(B)**

417 After each round of selection with a total of four FACS sorts, plasmid DNA from each sort was

418 prepped and deep sequenced. Enriched mutations for each residue at CDR loop in HC library  
419 (left) and LC library (right) relative to parental CR3022 sequence were analyzed and colored  
420 according to the key. (C) Locations of mutations (colored according to the key) seen in the top  
421 100 most frequent sequences recovered from long-read next-generation sequencing of enriched  
422 H/L pairs in the CR3022 combinatorial H/L library after sort 4.

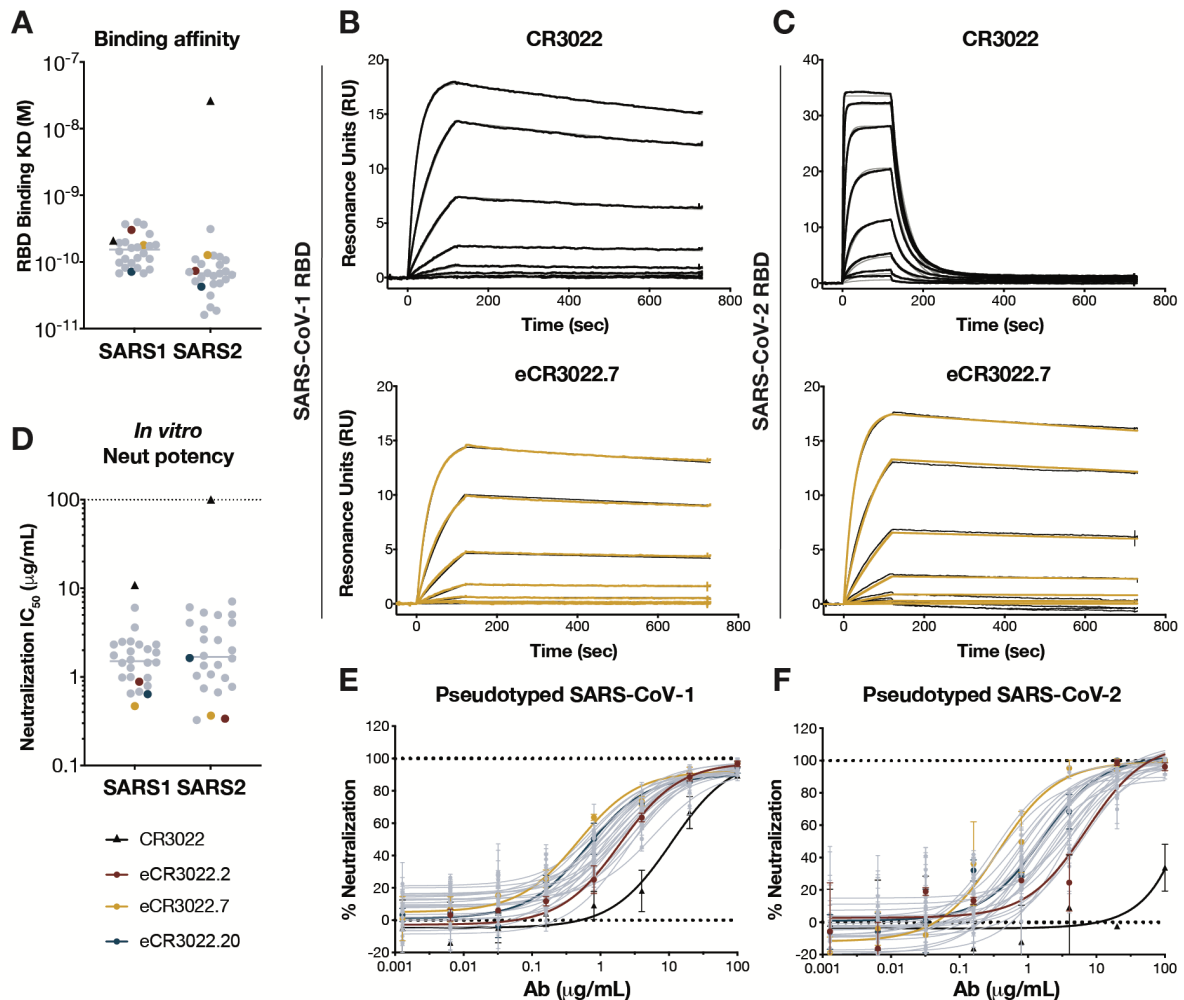

423

424 **Figure 2. Engineered eCR3022 variants with over 100-fold improved binding affinity for**

425 **SARS-CoV-2 RBD potentially neutralize SARS-CoV-2. (A)** Binding affinity (KD) of parental and

426 enhanced eCR3022 antibodies against SARS-CoV-1 and SARS-CoV-2 RBD by surface plasmon

427 resonance (SPR). Parental CR3022 is colored in black and represented as a triangle, eCR3022

428 variants are in grey whereas eCR3022.2, eCR3022.7, eCR3022.20 are highlighted in colors

429 according to the key. (B) SPR curves of parental CR3022 (top) and eCR3022.7 (bottom) binding

430 to SARS-CoV-1 RBD. (C) SPR curves of parental CR3022 (top) and eCR3022.7 (bottom) binding

431 to SARS-CoV-2 RBD. Antibodies were captured via Fc-capture to an anti-human IgG Fc antibody

432 and varying concentrations of SARS-CoV-1 or SARS-CoV-2 RBD were injected using a multi-

433 cycle method. Association and dissociation rate constants calculated through a 1:1 Langmuir

434 binding model using the BIAevaluation software. (D) Neutralization  $IC_{50}$ s of parental CR3022 and

435 eCR3022 antibodies against SARS-CoV-1 and SARS-CoV-2 pseudoviruses. (E-F) Neutralization

436 curves of parental CR3022 and eCR3022 antibodies against SARS-CoV-1 (E) and SARS-CoV-2

437 (F).



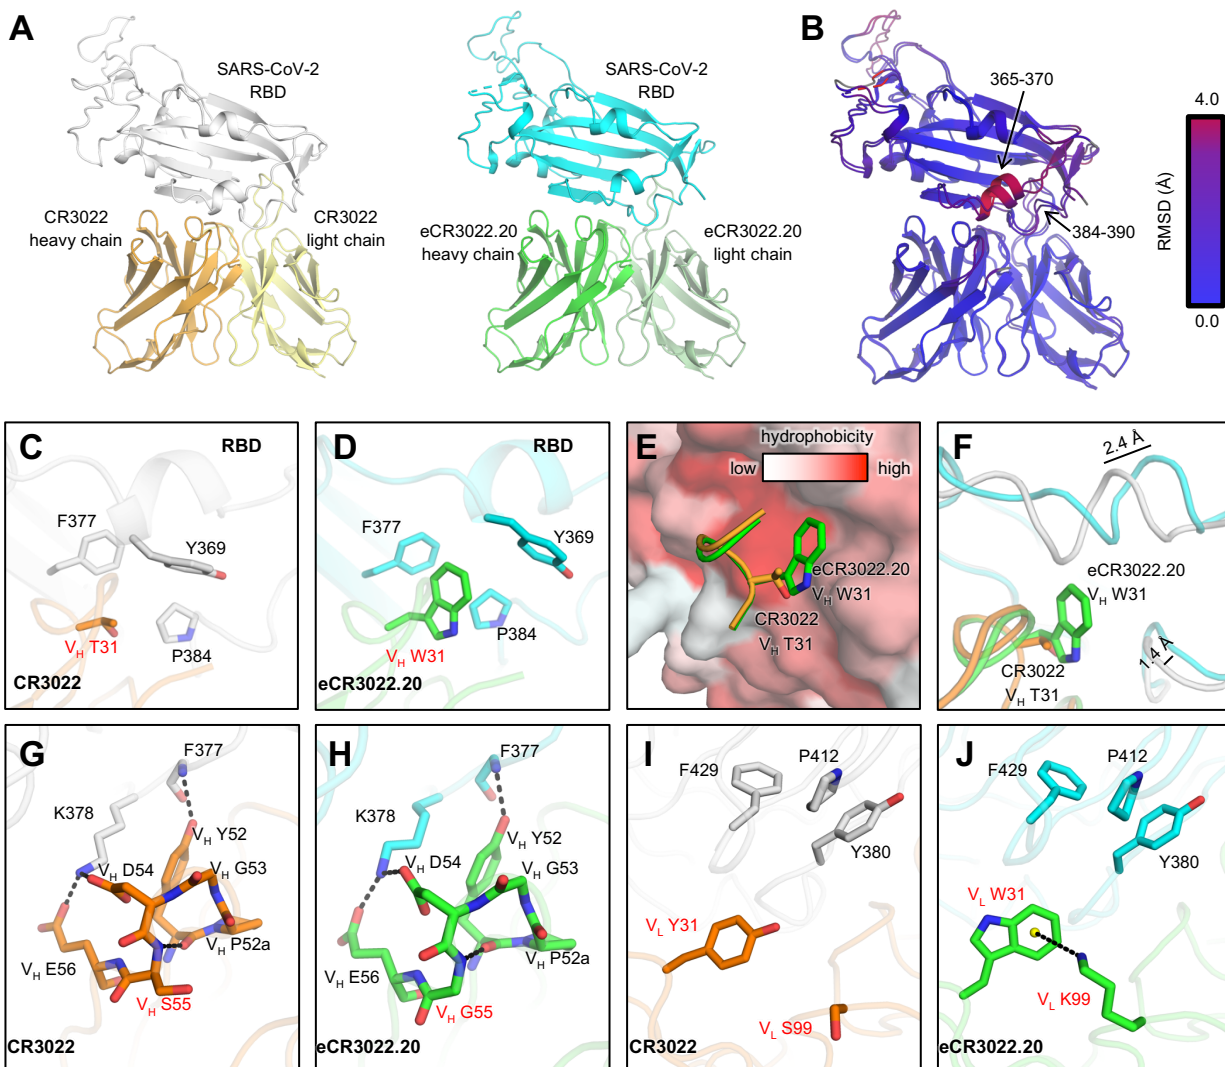

438  
 439 **Figure 3. Crystal structure of eCR3022.20 in complex with SARS-CoV-2 RBD.** Our previous  
 440 crystal structure of SARS-CoV-2 RBD in complex with CR3022 is shown for comparison (PDB:  
 441 6W41) (Yuan et al., 2020a). Hydrogen bonds and salt bridges are represented by black dashed  
 442 lines. Residues that differ between the two antibodies are highlighted in red letters. (A) CR3022  
 443 and eCR3022.20 bind to SARS-CoV-2 RBD via the same binding mode. Left, crystal structure of  
 444 SARS-CoV-2 RBD (white) in complex with CR3022 (heavy and light chains are shown in orange  
 445 and light yellow, respectively). Right, crystal structure of SARS-CoV-2 RBD (cyan) in complex  
 446 with eCR3022.20 (heavy and light chains are shown in green and olive, respectively). Antibody  
 447 constant domains are omitted here for clarity. Antibody CC12.3 (Yuan et al., 2020b) that was used  
 448 to aid in the crystallization of the RBD/eCR3022.20 complex is shown in Figure S8. (B)  
 449 Superimposition of structures RBD/CR3022 and RBD/eCR3022.20. Structural differences are  
 450 color-coded by their Root Mean Square Deviation (RMSD). (C-F) Comparison between the

451 paratope V<sub>H</sub> T31 in CR3022 and its counterpart V<sub>H</sub> W31 in eCR3022.20. **(E)** V<sub>H</sub> T31/W31 interact  
452 with a hydrophobic pocket in the SARS-CoV-2 RBD. **(G-H)** Interactions between CDR H2 of **(G)**  
453 CR3022 and **(H)** eCR3022.20 with the SARS-CoV-2 RBD. **(I-J)** V<sub>L</sub> Y31/S99 in CR3022 are  
454 substituted by W31/K99 in eCR3022.20. **(J)** V<sub>L</sub> W31 and K99 in eCR3022.20 form a cation- $\pi$   
455 interaction. The 6-carbon aromatic ring center is represented by a yellow sphere.

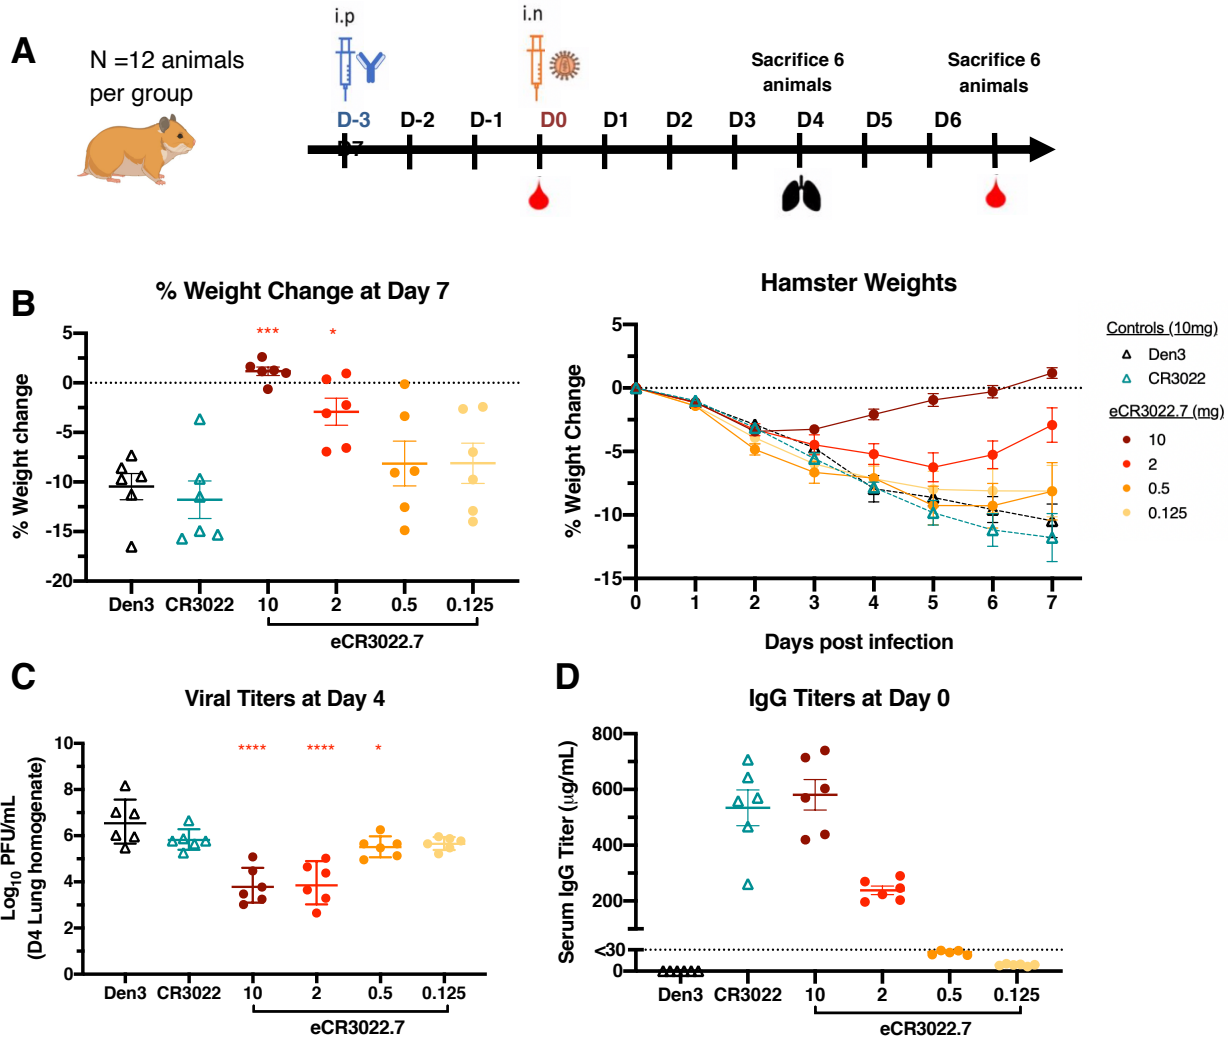

456

457 **Figure 4. A non-neutralizing mAb can be engineered to become a nAb against SARS-CoV-**

458 **2 and protects against weight loss and lung viral replication in Syrian hamsters. (A)**

459 engineered mAb eCR3022.7 was administered at a starting dose of either 10 mg per animal, 2

460 mg per animal, 0.5 mg per animal or 0.125 mg per animal. Control animals received 10 mg of

461 Den3 or 10 mg of original mAb CR3022. Each group of 12 animals was challenged intranasally

462 (i.n.) 72 hours after infusion with  $1 \times 10^5$  PFU of SARS-CoV-2. Serum was collected at the time

463 of challenge (day 0) and upon completion of the experiment (day 7). Animal weight was monitored

464 as an indicator of disease progression. Six hamsters were sacrificed on day 4 and lung tissue

465 was collected for viral burden assessment and the remaining hamsters were sacrificed on day 7.

466 **(B)** Percent weight change was calculated from the day of infection (day 0) for all animals. **(C)**

467 Viral load, as quantitated by live virus plaque assay on Vero E6 cells from lung tissue

468 homogenate. Error bars represent geometric standard deviations of the geometric mean. **(D)**

469 Serum titers of the passively administered mAb, as assessed by ELISA at the time of challenge

470 (72 hours after intraperitoneal (i.p.) administration). Statistical significance ( $p < 0.05$ ) of groups in  
471 comparison to Den3 IgG control group were calculated by Ordinary One-Way ANOVA test using  
472 Graph Pad Prism 8.0. For weights and serum titers, error bars represent group average with  
473 standard error of the mean.

474 **SOM Tables**

475

476

|                      | H1     | H2      | H3          | Combinatorial |
|----------------------|--------|---------|-------------|---------------|
|                      | FITYWI | IYPGDSE | GGSGISTPMDV | H1*H2*H3      |
| <b>NNK CDRs</b>      | 192    | 256     | 352         | 1.73E+07      |
| <b>Rational CDRs</b> | 107    | 142     | 196         | 2.98E+06      |

|                      | L1          | L2       | L3       | Combinatorial |
|----------------------|-------------|----------|----------|---------------|
|                      | VLYSSINKNYL | IYWASTRE | QQYYSTPY | L1*L2*L3      |
| <b>NNK CDRs</b>      | 352         | 256      | 256      | 2.31E+07      |
| <b>Rational CDRs</b> | 192         | 141      | 141      | 3.82E+06      |

477

478 **Table S1. Theoretical library size. Related to Figure 1.** Comparison of NNK generated libraries  
 479 to rationally synthesized CDR libraries. The sequence of the starting CDR loop is given along with  
 480 the number of variants in each loop that would result from NNK scanning or rational synthesis.  
 481 The combinatorial size of the CDR1/2/3 library is given from the product of the 3 loops.

| mAb ID     | CDRH1  | CDRH2   | CDRH3       | CDRL1       | CDRL2    | CDRL3     | SPR against SARS-CoV-2 RBD |          |          | SPR against SARS-CoV RBD |          |          |
|------------|--------|---------|-------------|-------------|----------|-----------|----------------------------|----------|----------|--------------------------|----------|----------|
|            |        |         |             |             |          |           | ka [1/Ms]                  | kd [1/s] | KD [M]   | ka [1/Ms]                | kd [1/s] | KD [M]   |
| CR3022     | FITYWI | IYPGDSE | GGGGISTPMDV | VLYSSINKNYL | IYWASTRE | QQYYSTPY  | 1.26E+06                   | 3.31E-02 | 2.62E-08 | 1.36E+06                 | 2.84E-04 | 2.10E-10 |
| eCR3022.1  | FIYYWI | IYPGDGE | GGGGISTPMDV | VLWSSINKNYL | IYWASHRE | QQYYRTPY  | 1.26E+06                   | 1.58E-04 | 1.25E-10 | 1.11E+06                 | 1.24E-04 | 1.12E-10 |
| eCR3022.2  | FIYYWI | IYPGDGE | GGGGISTPMDV | VLWSSINKNYL | IYWASQRE | QQYQSTPY  | 1.93E+06                   | 1.43E-04 | 7.41E-11 | 1.37E+06                 | 4.13E-04 | 3.02E-10 |
| eCR3022.3  | FIYYWI | IYPGDDE | GGGGISTPMDV | VLWSSINKNYL | LYWASTRE | QQYRSTPY  | 2.15E+06                   | 3.50E-05 | 1.62E-11 | 1.73E+06                 | 1.17E-04 | 6.79E-11 |
| eCR3022.4  | FIYYWI | IYPGDSE | GGGGISTPMDV | VLWSSINKNYL | IYWASYRE | EQYYSTPY  | 1.12E+06                   | 1.19E-04 | 1.07E-10 | 1.02E+06                 | 1.14E+04 | 1.12E-10 |
| eCR3022.5  | FIFYWI | IYPGDGE | GGGGISTPMDV | VLWSSINKNYL | IYWGSTRE | NQYYSTPY  | 1.82E+06                   | 1.17E-04 | 6.43E-11 | 7.35E+05                 | 1.33E-04 | 1.81E-10 |
| eCR3022.6  | FIFYWI | IYPGDGE | GGGGISTPMDV | VLWSSINKNYL | EYWASTRE | QQYYSTPY  | 2.03E+06                   | 1.04E-04 | 5.13E-11 | 8.12E+05                 | 1.57E-04 | 1.94E-10 |
| eCR3022.7  | FIYYWI | IYPGDGE | GGGGISTPMDV | VLWSSINKNYL | IYWASHRE | NQYYSTPY  | 1.17E+06                   | 1.48E-04 | 1.27E-10 | 9.39E+05                 | 1.69E-04 | 1.80E-10 |
| eCR3022.8  | FIYYWI | IYPGDGE | GGGGISTPMDV | VLWSSINKNYL | IYWASHRE | EQYYSTPY  | 1.59E+06                   | 3.32E-05 | 2.10E-11 | 1.44E+06                 | 9.74E-05 | 6.77E-11 |
| eCR3022.9  | FIYYWI | IYPGDGE | GGGGISTPMDV | VLWSSINKNYL | IYWASKRE | QQYYITPY  | 1.10E+06                   | 3.42E-04 | 3.12E-10 | 1.07E+06                 | 1.73E-04 | 1.63E-10 |
| eCR3022.10 | FIYYWI | IYPGDGE | GGGGISTPMDV | VLWSSINKNYL | IYWARTRE | QNYYSTPY  | 1.52E+06                   | 1.68E-04 | 1.10E-10 | 1.32E+06                 | 1.78E-04 | 1.35E-10 |
| eCR3022.11 | FIFYWI | IYPGDGE | GGGGISTPMDV | VLWSSINKNYL | IYWAGTRE | AQYYSTPY  | 2.18E+06                   | 6.86E-05 | 3.14E-11 | 9.67E+05                 | 9.35E-05 | 9.67E-11 |
| eCR3022.12 | FIYYWI | IYPGDGE | GGGGISTPMDV | VLYSSINKNYL | IYWASYRE | QQYSHIPY  | 1.30E+06                   | 1.22E-04 | 9.40E-11 | 1.26E+06                 | 1.83E-04 | 1.45E-10 |
| eCR3022.13 | FIFYWI | IYPGDGE | GGGGISTPMDV | VLWSSINKNYL | IYWESTRE | GQYYSTPY  | 2.43E+06                   | 4.55E-05 | 1.87E-11 | 9.55E+05                 | 7.40E-05 | 7.75E-11 |
| eCR3022.14 | FIYYWI | IYPGDGE | GGGGISTPMDV | VLWSSINKNYL | IYWASTQE | QQYKSTPY  | 2.04E+06                   | 1.45E-04 | 7.09E-11 | 1.83E+06                 | 1.80E-04 | 9.84E-11 |
| eCR3022.15 | FIYYWI | IYPGDGE | GGGGISTPMDV | VLWSSINKNYL | IYWAQTRE | NQYYSTPY  | 1.31E+06                   | 8.93E-05 | 6.83E-11 | 1.24E+06                 | 1.02E-04 | 8.23E-11 |
| eCR3022.16 | FIFYWI | IYPGDGE | GGGGISTPMDV | VLYSSWKNKYL | IYWALTRE | QQYKSTPY  | 1.59E+06                   | 1.91E-04 | 1.20E-10 | 1.05E+06                 | 2.76E-04 | 2.64E-10 |
| eCR3022.17 | FIYYWI | IYPGDGE | GGGGISTPMDV | VLRSSINKNYL | IYWASHRE | QQYYSWIPY | 1.59E+06                   | 1.07E-04 | 6.71E-11 | 1.27E+06                 | 2.54E-04 | 1.99E-10 |
| eCR3022.18 | FIFYWI | IYPGDGE | GGGGISTPMDV | VLKSSINKNYL | IYWASARE | LQYYSTPY  | 1.87E+06                   | 8.77E-05 | 4.70E-11 | 7.42E+05                 | 2.96E-04 | 3.98E-10 |
| eCR3022.19 | FIYYWI | IYPGDGE | GGGGISTPMDV | VLKSSINKNYL | IYWHSTRE | AQYYSTPY  | 1.54E+06                   | 1.41E-04 | 9.10E-11 | 1.29E+06                 | 4.77E-04 | 3.70E-10 |
| eCR3022.20 | FIYYWI | IYPGDGE | GGGGISTPMDV | VLWSSINKNYL | IYWASTPE | QQYKTPY   | 1.85E+06                   | 7.93E-05 | 4.28E-11 | 1.55E+06                 | 1.11E-04 | 7.14E-11 |
| eCR3022.21 | FIYYWI | IYPGDDE | GGGGISTPMDV | VLRSSINKNYL | IYWASHRE | QQYYSTPY  | 1.86E+06                   | 1.03E-04 | 5.52E-11 | 1.59E+06                 | 2.65E-04 | 1.67E-10 |
| eCR3022.22 | FIYYWI | IYPGDGE | GGGGISTPMDV | VLWSSINKNYL | IYWASHRE | QQYKSTPY  | 1.86E+06                   | 1.35E-04 | 7.28E-11 | 1.63E+06                 | 1.87E-04 | 1.15E-10 |
| eCR3022.23 | FIYYWI | IYPGDGE | GGGGISTPMDV | VLYHSINKNYL | IYWASHRE | QQYHSTPY  | 2.03E+06                   | 1.18E-04 | 5.82E-11 | 9.49E+05                 | 3.46E-04 | 3.65E-10 |
| eCR3022.24 | FIFYWI | IYPGDGE | GGGGISTPMDV | VLWSSINKNYL | IYWKSTRE | QQYHSTPY  | 1.76E+06                   | 1.09E-04 | 6.19E-11 | 7.55E+05                 | 1.31E-04 | 1.74E-10 |
| eCR3022.25 | FIYYWI | IYPGDSE | GGGGISTPMDV | VLWSSINKNYL | IYWSSTRE | EQYYSTPY  | 1.59E+06                   | 7.66E-05 | 4.81E-11 | 1.37E+06                 | 1.11E-04 | 8.15E-11 |

482

483 **Table S2. eCR3022 binding affinity and CDR loop sequences. Related to Figure 2.** Summary  
484 table of parental CR3022 and 25 eCR3022 antibodies with sequences of 6 CDR loops and binding  
485 affinity against SARS-CoV-2 RBD and SARS-CoV-1 RBD. Mutations of eCR3022 at CDR loops  
486 were highlighted in red. Antibodies were captured via Fc-capture to an anti-human IgG Fc  
487 antibody and varying concentrations of SARS-CoV-2 or SARS-CoV-1 RBD were injected using a  
488 multi-cycle method. Association and dissociation rate constants calculated through a 1:1  
489 Langmuir binding model using the BIAevaluation software.

|                                                                      |                                         |
|----------------------------------------------------------------------|-----------------------------------------|
| <b>Data collection</b>                                               | eCR3022.20 + SARS-CoV-2 RBD<br>+ CC12.3 |
| Beamline                                                             | SSRL12-1                                |
| Wavelength (Å)                                                       | 0.97946 Å                               |
| Space group                                                          | C 2 2 2 <sub>1</sub>                    |
| Unit cell parameters                                                 |                                         |
| a, b, c (Å)                                                          | 157.6, 161.2, 230.1                     |
| α, β, γ (°)                                                          | 90, 90, 90                              |
| Resolution (Å) <sup>a</sup>                                          | 50.0-2.85 (2.90-2.85)                   |
| Unique reflections <sup>a</sup>                                      | 67,884                                  |
| Redundancy <sup>a</sup>                                              | 3.3 (3.3)                               |
| Completeness (%) <sup>a</sup>                                        | 99.4 (99.9)                             |
| <I/σ <sub>I</sub> > <sup>a</sup>                                     | 24.6 (1.1)                              |
| R <sub>sym</sub> <sup>b</sup> (%) <sup>a</sup>                       | 14.5 (>100)                             |
| R <sub>pim</sub> <sup>b</sup> (%) <sup>a</sup>                       | 6.2 (45.2)                              |
| CC <sub>1/2</sub> <sup>c</sup> (%) <sup>a</sup>                      | 98.4 (66.0)                             |
| <b>Refinement statistics</b>                                         |                                         |
| Resolution (Å)                                                       | 2.90-2.85                               |
| Reflections (work)                                                   | 67,847                                  |
| Reflections (test)                                                   | 3,440                                   |
| R <sub>cryst</sub> <sup>d</sup> / R <sub>free</sub> <sup>e</sup> (%) | 20.9/25.1                               |
| No. of atoms                                                         | 16,286                                  |
| Macromolecules                                                       | 16,244                                  |
| RBD                                                                  | 3,066                                   |
| eCR3022.20 Fab                                                       | 6,676                                   |
| CC12.3 Fab                                                           | 6,502                                   |
| Glycan                                                               | 42                                      |
| Average B-values (Å <sup>2</sup> )                                   | 60                                      |
| Macromolecules                                                       | 60                                      |
| RBD                                                                  | 63                                      |
| eCR3022.20 Fab                                                       | 57                                      |
| CC12.3 Fab                                                           | 62                                      |
| Glycan                                                               | 85                                      |
| Wilson B-value (Å <sup>2</sup> )                                     | 61                                      |
| <b>RMSD from ideal geometry</b>                                      |                                         |
| Bond length (Å)                                                      | 0.005                                   |
| Bond angle (°)                                                       | 1.2                                     |
| <b>Ramachandran statistics (%)</b>                                   |                                         |
| Favored                                                              | 95.6                                    |
| Outliers                                                             | 0.24                                    |
| <b>PDB code</b>                                                      | pending                                 |

490 <sup>a</sup> Numbers in parentheses refer to the highest resolution shell.

491 <sup>b</sup>  $R_{sym} = \sum_{hkl} \sum_i |I_{hkl,i} - \langle I_{hkl} \rangle| / \sum_{hkl} \sum_i I_{hkl,i}$  and  $R_{pim} = \sum_{hkl} (1/(n-1))^{1/2} \sum_i |I_{hkl,i} - \langle I_{hkl} \rangle| / \sum_{hkl} \sum_i I_{hkl,i}$ , where  $I_{hkl,i}$  is the scaled intensity of the  
492  $i^{\text{th}}$  measurement of reflection h, k, l,  $\langle I_{hkl} \rangle$  is the average intensity for that reflection, and  $n$  is the redundancy.

493 <sup>c</sup> CC<sub>1/2</sub> = Pearson correlation coefficient between two random half datasets.

494 <sup>d</sup>  $R_{cryst} = \sum_{hkl} |F_o - F_c| / \sum_{hkl} |F_o| \times 100$ , where  $F_o$  and  $F_c$  are the observed and calculated structure factors, respectively.

495 <sup>e</sup>  $R_{free}$  was calculated as for  $R_{cryst}$ , but on a test set comprising 5% of the data excluded from refinement.

496 **Table S3. X-ray data collection and refinement statistics. Related to Figure 3.**

| Animal ID     | Antibody     | Dose (mg) | Weight (g) at D-3 | Weight (g) at D0 | Weight (g) at D1 | Weight (g) at D2 | Weight (g) at D3 | Weight (g) at D4 | Weight (g) at D5 | Weight (g) at D6 | Weight (g) at D7 | Serum titer at Day 0 (µg/ml) | Serum titer at Day 7 (µg/ml) | Sars-CoV-2 PFU/ml. at D4 |
|---------------|--------------|-----------|-------------------|------------------|------------------|------------------|------------------|------------------|------------------|------------------|------------------|------------------------------|------------------------------|--------------------------|
| 2371          | Den3 Ctrl    | 10        | 140.7             | 142.4            | 140.7            | 139.8            | 136.5            | 124.5            | 133              | 132.4            | 132              | 0                            | 0                            | 3.00E+05                 |
| 2372          | Den3 Ctrl    | 10        | 169.4             | 173.3            | 172.1            | 169.1            | 167.3            | 163.6            | 159.4            | 158.1            | 157              | 0                            | 0                            | 9.00E+05                 |
| 2373          | Den3 Ctrl    | 10        | 127.4             | 128.8            | 126.8            | 124.9            | 122.2            | 121              | 118.5            | 117.7            | 116.3            | 0                            | 0                            | 9.00E+06                 |
| 2374          | Den3 Ctrl    | 10        | 140.3             | 143.6            | 141.2            | 137.5            | 134.9            | 130.7            | 127.3            | 123.5            | 119.9            | 0                            | 0                            | 1.50E+08                 |
| 2375          | Den3 Ctrl    | 10        | 145.7             | 147.9            | 146.2            | 143.2            | 140.1            | 137.3            | 135.7            | 135.7            | 135.2            | 0                            | 0                            | 1.05E+07                 |
| 2393          | Den3 Ctrl    | 10        | 146.5             | 147.2            | 146.3            | 143.3            | 141              | 136.5            | 133.2            | 131.3            | 130.6            | 0                            | 0                            | 1.05E+06                 |
| 2366          | CR3022       | 10        | 166.2             | 167.4            | 166.2            | 162.6            | 158              | 153.2            | 149.7            | 146.6            | 142.4            | 643.28                       | 224.49                       | 4.50E+05                 |
| 2367          | CR3022       | 10        | 161.9             | 164.6            | 163.2            | 159.1            | 155.6            | 150.1            | 146.4            | 146.1            | 145.7            | 707.05                       | 115.54                       | 7.50E+05                 |
| 2368          | CR3022       | 10        | 147.7             | 150.9            | 149.1            | 146.5            | 145.4            | 141.1            | 143.2            | 143.2            | 145.4            | 260.46                       | 136.43                       | 4.50E+06                 |
| 2369          | CR3022       | 10        | 150               | 153.4            | 151.6            | 147.9            | 144.1            | 141.3            | 136.8            | 131.5            | 129.3            | 569.90                       | 102.19                       | 1.80E+05                 |
| 2370          | CR3022       | 10        | 158.8             | 162.1            | 161.1            | 158.9            | 153.2            | 151.3            | 146.3            | 142              | 137.3            | 467.18                       | 109.73                       | 6.00E+05                 |
| 2392          | CR3022       | 10        | 156.6             | 158.4            | 156.2            | 151.9            | 147.2            | 144.9            | 139.9            | 140              | 143.1            | 558.62                       | 283.71                       | 6.00E+05                 |
| One Way ANOVA | P-Value      | 10        | -                 | -                | 0.9382           | 0.9898           | 0.8119           | 0.9999           | 0.9006           | 0.8517           | 0.9707           | <0.0001                      | <0.0001                      | 0.2215                   |
| One Way ANOVA | Significance | 10        | -                 | -                | ns               | ns               | ns               | ns               | ns               | ns               | ns               | ****                         | ****                         | ns                       |
| 2361          | CR3022.7     | 10        | 149.4             | 153.2            | 152              | 148.1            | 148              | 151.8            | 154.1            | 155              | 155.7            | 603.78                       | 242.27                       | 1.20E+05                 |
| 2362          | CR3022.7     | 10        | 153.6             | 160.3            | 158.1            | 154.1            | 155.2            | 157.4            | 158.1            | 158.5            | 159.3            | 714.39                       | 356.63                       | 1.05E+03                 |
| 2363          | CR3022.7     | 10        | 165.9             | 171.3            | 169.9            | 166.6            | 167.2            | 169.3            | 171.1            | 172.2            | 173              | 569.76                       | 202.71                       | 6.00E+03                 |
| 2364          | CR3022.7     | 10        | 155.1             | 155.8            | 153.2            | 149.2            | 148.8            | 150              | 151.6            | 153.2            | 157.6            | 438.53                       | 112.24                       | 3.00E+03                 |
| 2365          | CR3022.7     | 10        | 124.8             | 126.1            | 124.7            | 122.1            | 122.8            | 123.1            | 123.8            | 124.5            | 127.7            | 740.11                       | 346.24                       | 1.80E+03                 |
| 2391          | CR3022.7     | 10        | 155.3             | 153.2            | 151.8            | 148.3            | 147.9            | 149.4            | 152.8            | 154.2            | 157.2            | 419.67                       | 140.24                       | 3.00E+04                 |
| One Way ANOVA | P-Value      | 10        | -                 | -                | 0.9998           | 0.7868           | 0.3677           | 0.0002           | 0.0002           | <0.0001          | 0.0001           | <0.0001                      | <0.0001                      | <0.0001                  |
| One Way ANOVA | Significance | 10        | -                 | -                | ns               | ns               | ns               | ***              | ***              | ****             | ***              | ****                         | ****                         | ****                     |
| 2376          | CR3022.7     | 2         | 145.6             | 149.5            | 147              | 141.5            | 138.2            | 137.4            | 135.4            | 137.4            | 139.7            | 196.44                       | 88.08                        | 4.50E+03                 |
| 2377          | CR3022.7     | 2         | 157.1             | 158.8            | 156.8            | 155.2            | 155              | 155.4            | 156.5            | 157.2            | 159.4            | 246.33                       | 89.47                        | 4.50E+04                 |
| 2378          | CR3022.7     | 2         | 165.5             | 170.4            | 169              | 166              | 164.7            | 163.6            | 161.2            | 164.3            | 166.6            | 290.20                       | 56.63                        | 2.40E+04                 |
| 2379          | CR3022.7     | 2         | 154.2             | 157              | 155.7            | 153.3            | 152.1            | 148.9            | 147.3            | 148.8            | 152.2            | 269.80                       | 82.26                        | 1.05E+05                 |
| 2380          | CR3022.7     | 2         | 164.5             | 167              | 165.2            | 160.8            | 157.4            | 156.8            | 152.8            | 153.8            | 155.4            | 202.87                       | 40.37                        | 1.95E+03                 |
| 2394          | CR3022.7     | 2         | 166.8             | 169.7            | 167.4            | 163.8            | 161.8            | 160              | 158.6            | 159.9            | 171.3            | 223.26                       | 138.41                       | 4.50E+02                 |
| One Way ANOVA | P-Value      | 2         | -                 | -                | 0.9999           | 0.9172           | 0.9986           | 0.1091           | 0.4263           | 0.0976           | 0.0136           | 0.0002                       | 0.0483                       | <0.0001                  |
| One Way ANOVA | Significance | 2         | -                 | -                | ns               | ns               | ns               | ns               | ns               | ns               | *                | ***                          | *                            | ****                     |
| 2386          | CR3022.7     | 0.5       | 153               | 162.7            | 160.1            | 153.3            | 153.8            | 155              | 154.9            | 156.4            | 162.5            | 26.02                        | 7.96                         | 3.00E+05                 |
| 2387          | CR3022.7     | 0.5       | 155               | 158.3            | 156.4            | 153.4            | 153.2            | 153.5            | 149.8            | 151.4            | 153              | 22.57                        | 0.62                         | 4.50E+05                 |
| 2388          | CR3022.7     | 0.5       | 145               | 148.3            | 146.5            | 141.6            | 138              | 133.9            | 128.7            | 128.1            | 129.7            | 28.89                        | 0.24                         | 9.00E+04                 |
| 2389          | CR3022.7     | 0.5       | 141.2             | 142.4            | 140.3            | 135.4            | 130.4            | 131.2            | 126.6            | 127.2            | 129.5            | 28.74                        | 0.32                         | 1.80E+06                 |
| 2390          | CR3022.7     | 0.5       | 169.3             | 173.5            | 170.5            | 162.7            | 158              | 156.7            | 150.9            | 150              | 147.7            | 23.16                        | 0.58                         | 4.50E+05                 |
| 2388          | CR3022.7     | 0.5       | 140.5             | 144.9            | 143              | 138.3            | 134.9            | 134              | 133.2            | 131.1            | 132              | 31.03                        | 3.05                         | 1.35E+05                 |
| One Way ANOVA | P-Value      | 0.5       | -                 | -                | 0.634            | 0.005            | 0.1445           | 0.9265           | 0.9927           | 0.9997           | 0.7831           | 0.9751                       | >0.9999                      | 0.0453                   |
| One Way ANOVA | Significance | 0.5       | -                 | -                | ns               | **               | ns               | ns               | ns               | ns               | ns               | ns                           | ns                           | *                        |
| 2381          | CR3022.7     | 0.125     | 148.2             | 151.7            | 149.5            | 144.9            | 143.2            | 144.1            | 144.6            | 145.5            | 147.7            | 8.80                         | 0.62                         | 4.50E+05                 |
| 2382          | CR3022.7     | 0.125     | 147.8             | 128.3            | 128              | 126              | 125.5            | 123.4            | 124.3            | 124.9            | 125.2            | 7.84                         | 0.00                         | 9.00E+05                 |
| 2383          | CR3022.7     | 0.125     | 126.3             | 123.7            | 121.1            | 118.5            | 114.7            | 111.1            | 109.4            | 108              | 106.4            | 9.70                         | 1.80                         | 7.50E+05                 |
| 2384          | CR3022.7     | 0.125     | 149.9             | 150.9            | 148.5            | 143.3            | 140              | 138.2            | 135.1            | 135.7            | 136.2            | 9.00                         | 0.00                         | 1.65E+05                 |
| 2385          | CR3022.7     | 0.125     | 148.2             | 151.9            | 149.5            | 145.7            | 142.2            | 141.6            | 140.8            | 141.2            | 141.3            | 10.31                        | 1.70                         | 3.00E+05                 |
| 2395          | CR3022.7     | 0.125     | 171.9             | 178.8            | 176.3            | 171.8            | 166              | 163.3            | 159.6            | 157.3            | 155.7            | 6.40                         | 0.00                         | 6.00E+05                 |
| One Way ANOVA | P-Value      | 0.125     | -                 | -                | 0.7209           | 0.2344           | 0.5024           | 0.943            | 0.9927           | 0.8852           | 0.7756           | 0.9997                       | >0.9999                      | 0.0961                   |
| One Way ANOVA | Significance | 0.125     | -                 | -                | ns               | ns               | ns               | ns               | ns               | ns               | ns               | ns                           | ns                           | ns                       |

497

498 **Table S4. Hamster Protection Study Summary and Statistics. Related to Figure 4. Each**

499 group was compared to the Den3 IgG control group.

500



501 **SOM Figures**

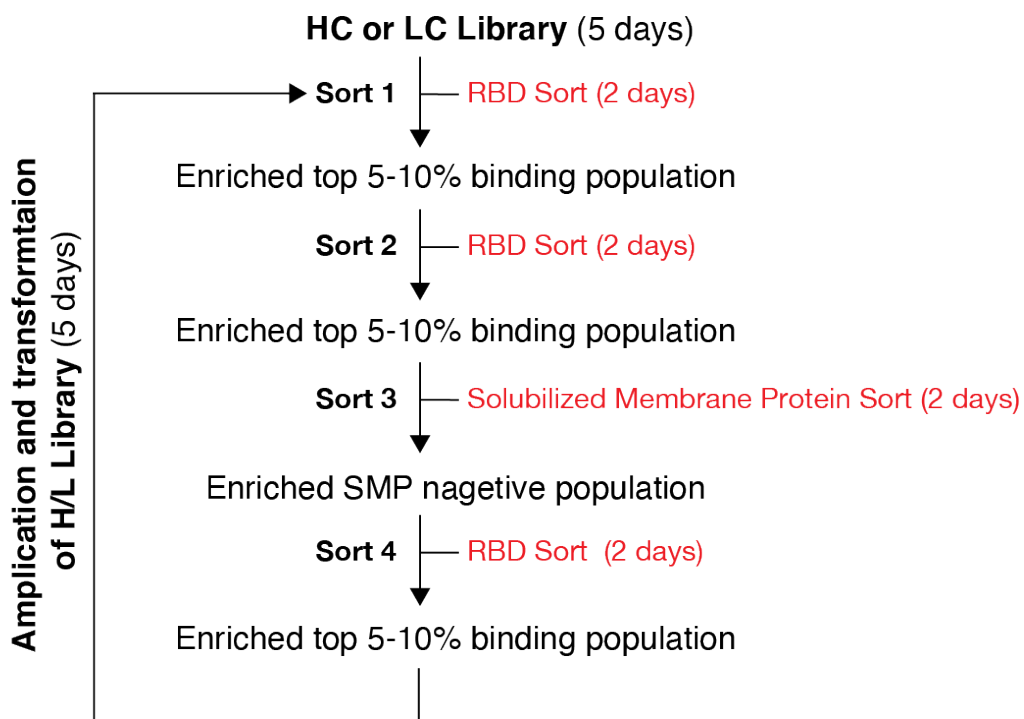

502

503

504 **Figure S1. Overview of the library sorting process. Related to Figure 1.** Schematic illustration  
505 of yeast population enrichment from HC, LC and combinatorial H/L libraries following four rounds  
506 of FACS selection.

507

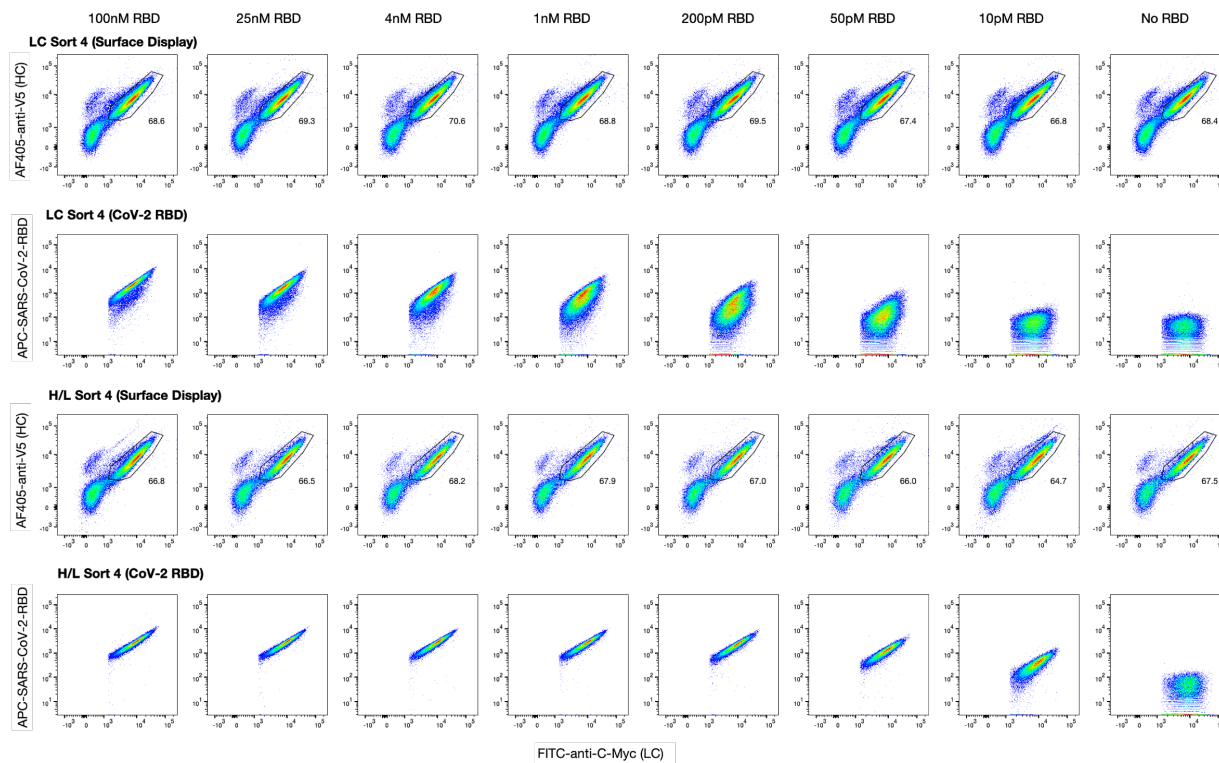

508

509 **Figure S2. Representative FACS plots of CR3022 LC and H/L libraries in sort 4. Related to**  
510 **Figure 1.** Yeast cells were induced and grown overnight at 30°C. Surface antibody display  
511 frequency was determined by staining with AF405-anti-V5 antibody (HC) and FITC-anti-c-Myc  
512 (LC). Cells were also labeled with different unsaturated concentrations of biotinylated SARS-CoV-  
513 2 RBD: 100 nM, 25 nM, 4 nM, 1 nM, 200 pM, 50 pM, 10 pM respectively. Labeled cells were  
514 further stained with APC conjugated streptavidin. FACS analysis was performed by BD  
515 FACSlyrics.

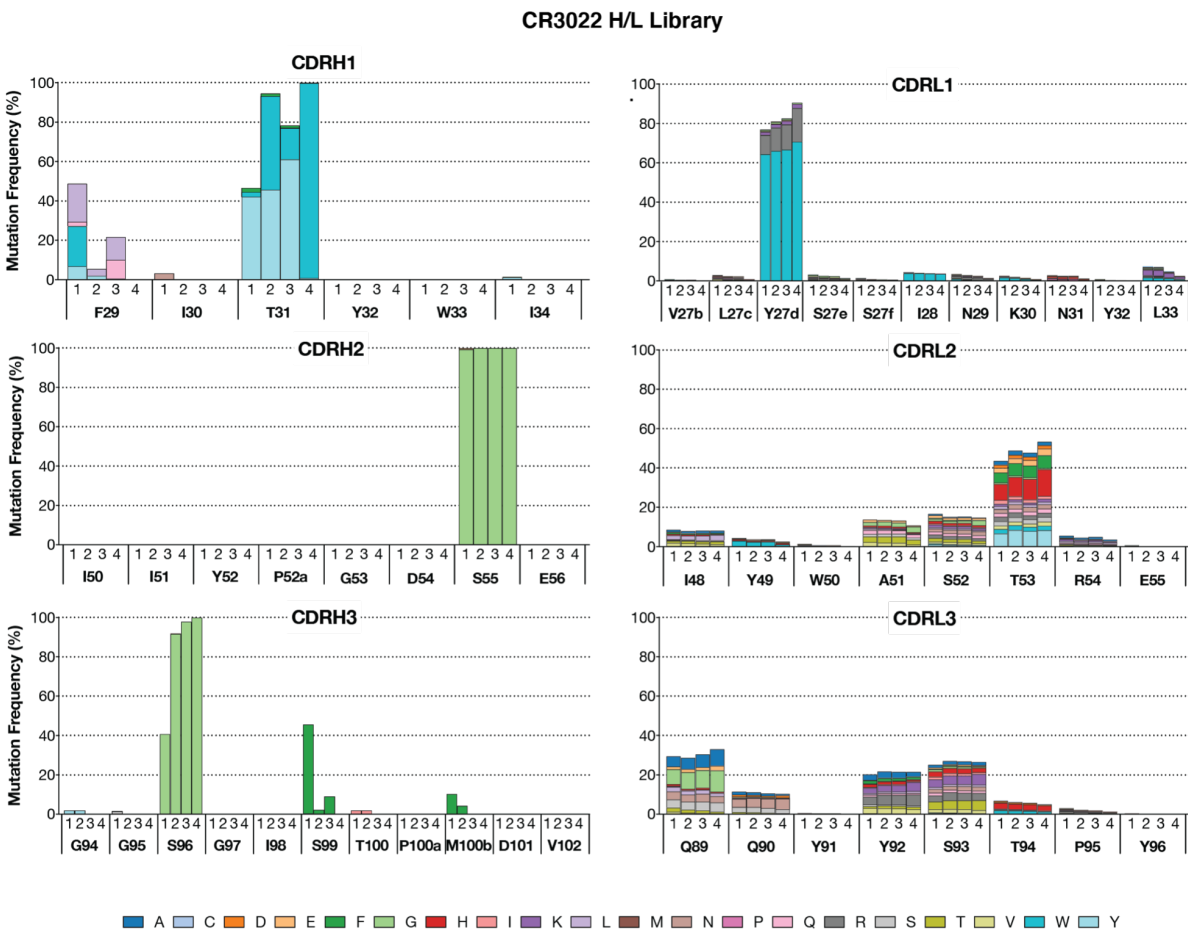

516

517 **Figure S3. Deep sequencing analysis of mutations of CDR loops from the CR3022**  
 518 **combinatorial H/L library. Related to Figure 1.** HC and LC from the combinatorial H/L library  
 519 were amplified separately and then loaded onto Illumina Miseq sequencer using a Miseq Reagent  
 520 V3 kit (600 cycles). Mutations in each CDR loop of HC (left) and LC (right) after each round of  
 521 FACS sort were highlighted in colors corresponding to the key.

522

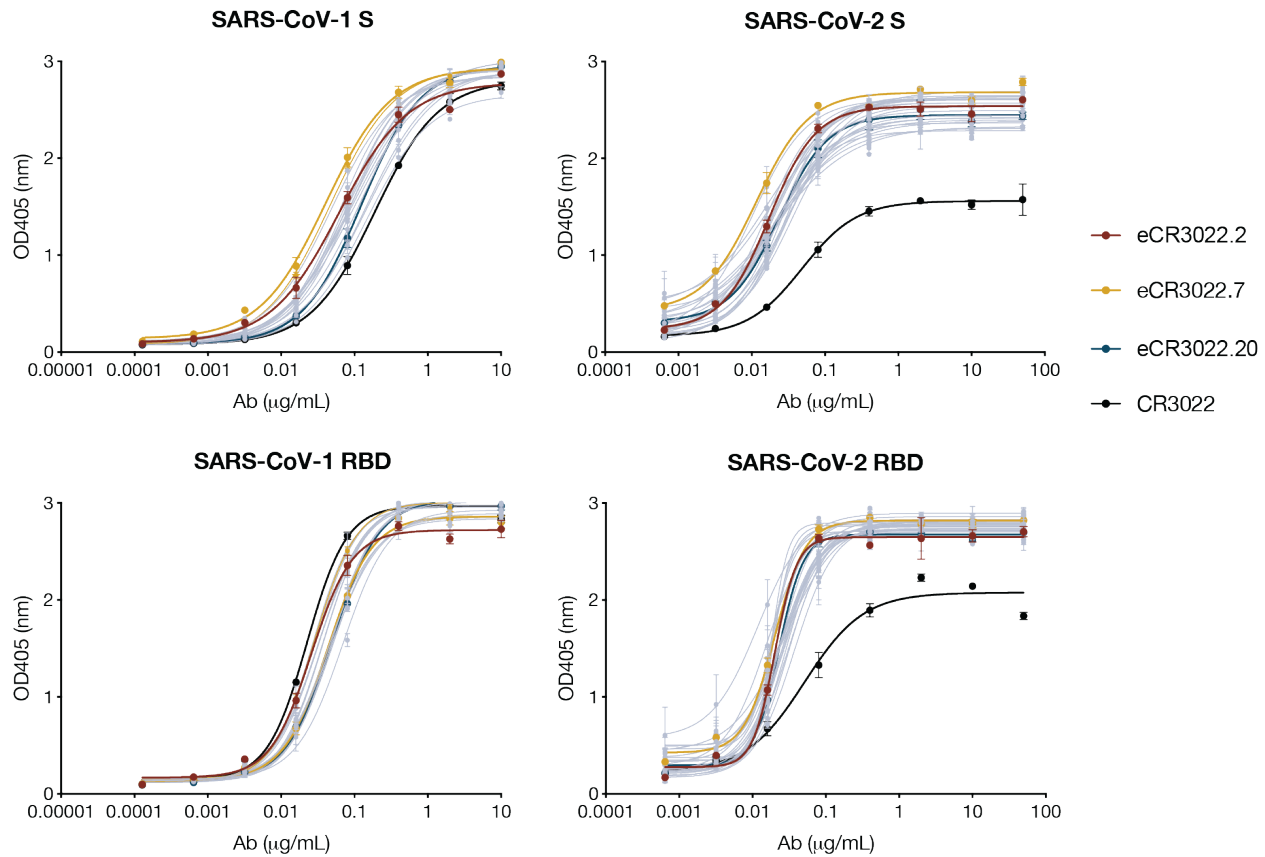

523

524 **Figure S4. eCR3022 variants ELISA binding to SARS-CoV-1 and SARS-CoV-2 RBD and S**  
525 **proteins. Related to Figure 2.** eCR3022 and parental CR3022 antibodies were evaluated  
526 binding against his-tagged SARS-CoV-1, SARS-CoV-2 RBD and S proteins. Each sample was  
527 tested in duplicates. Error bars represent standard deviations.

528

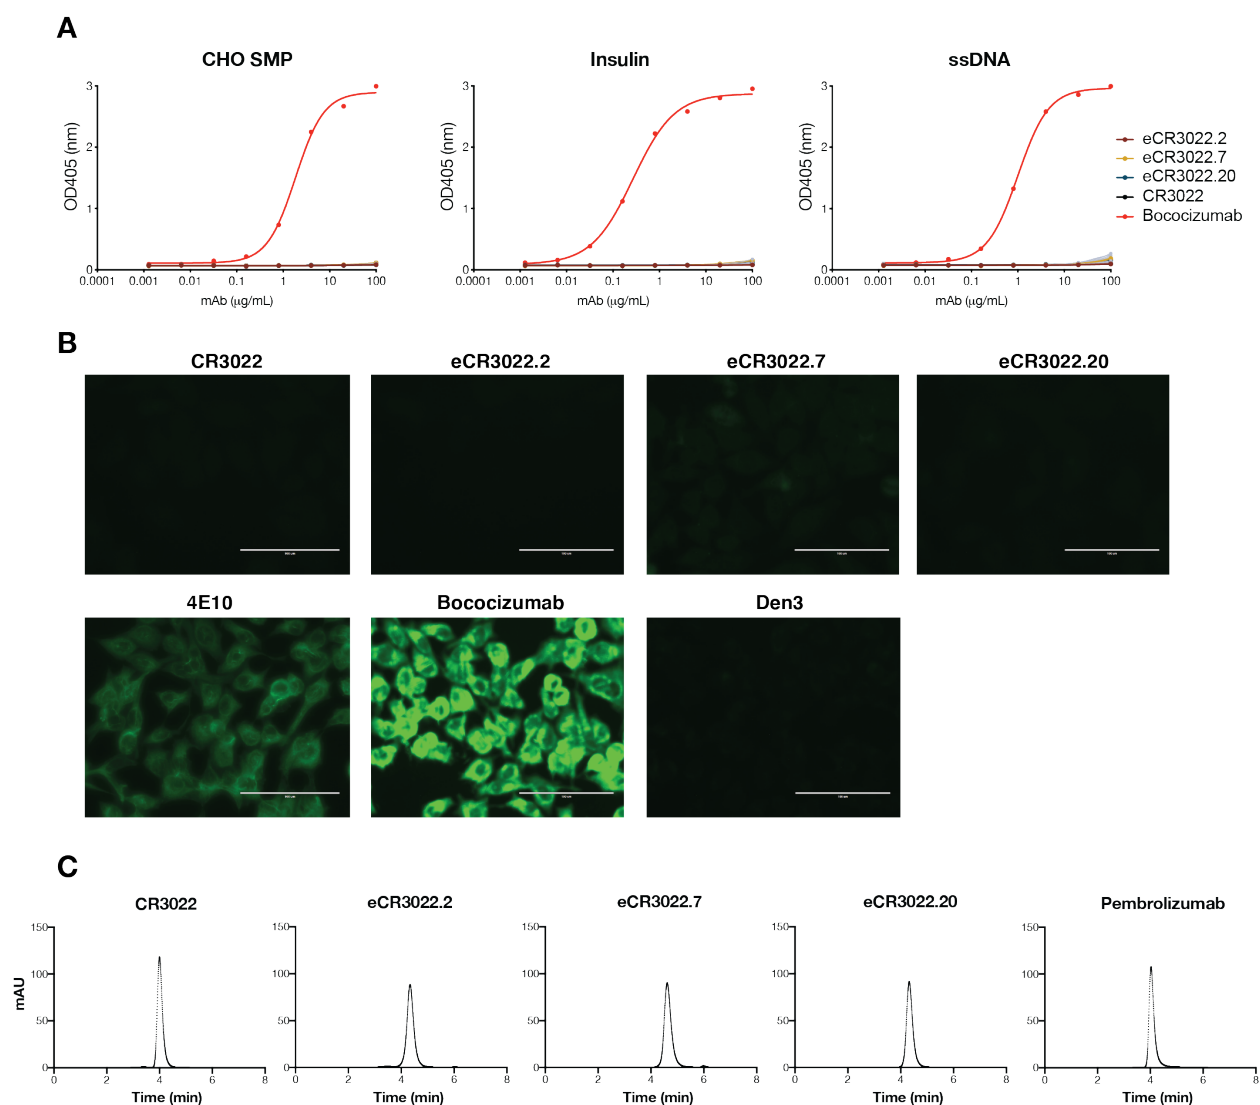

529

530 **Figure S5. Evaluation of eCR3022 variants for polyreactivity and biopharmaceutical**  
531 **analysis. Related to Figure 2.** Antibodies were tested by ELISA for binding against polyspecific  
532 reagents (PSR) against Chinese hamster ovary cells (CHO) solubilized membrane protein (SMP),  
533 insulin, single-strand DNA (ssDNA) (**A**) and by binding to immobilized HEp2 epithelial cells (**B**).  
534 Antibodies were further analyzed by Agilent size-exclusion chromatography (SEC) column (**C**)  
535 with an FDA-approved antibody Pembrolizumab as positive control.

536

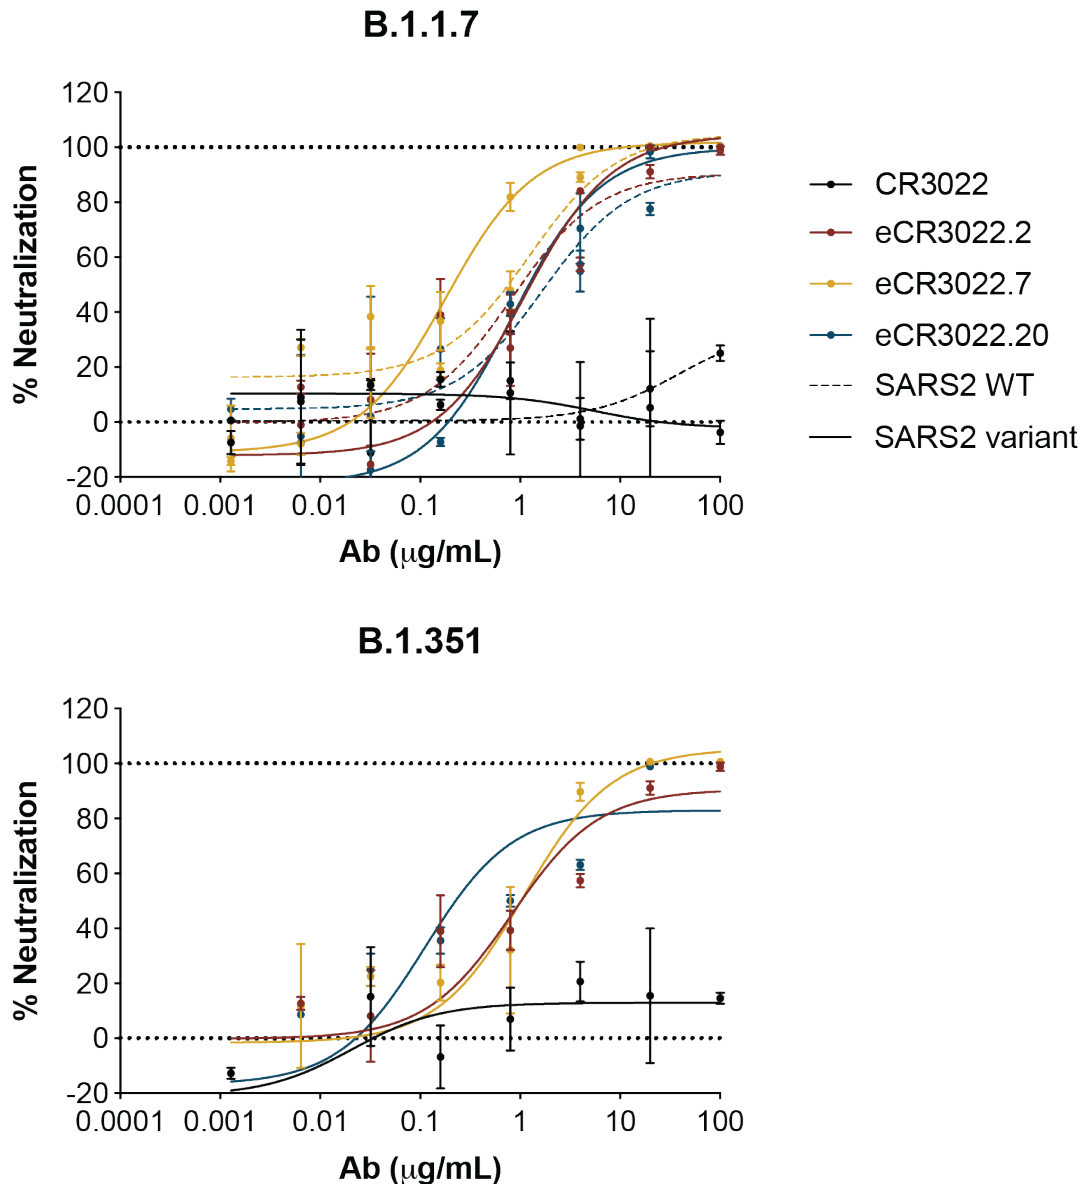

537

538 **Figure S6. Representative neutralization of pseudotyped B.1.1.7 and B.1.351 variants.**

539 **Related to Figure 2.** Neutralization curves of parental CR3022 and eCR3022 antibodies against

540 pseudotyped B.1.1.7 and B.1.351 lineages with full-spike mutations. Solid lines represent

541 neutralization curves against SARS-CoV-2 variants while dashed lines represent curves against

542 wildtype virus. Error bars represent standard deviations.

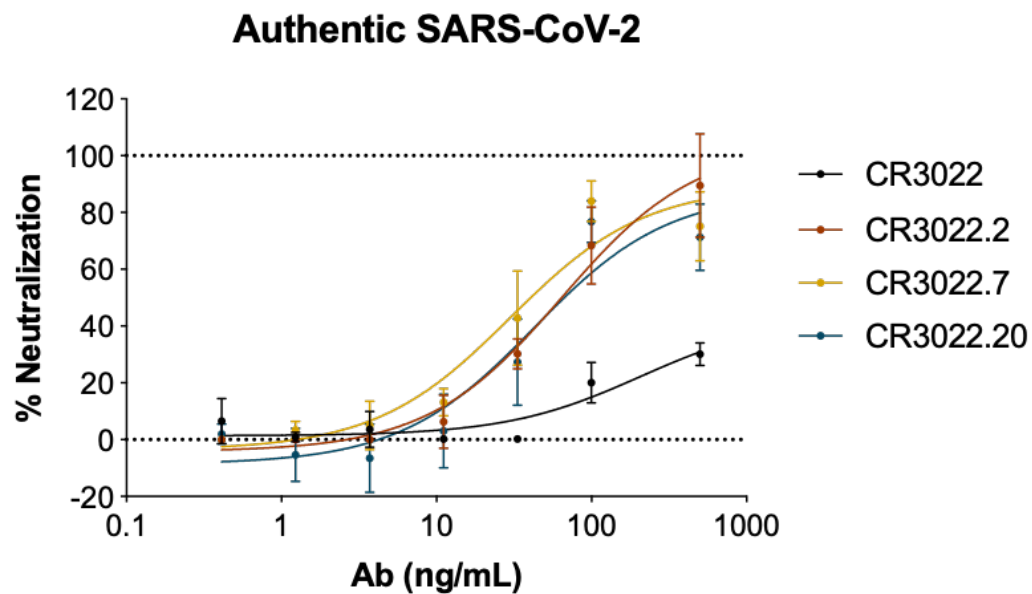

543

544 **Figure S7. Representative neutralization of authentic SARS-CoV-2. Related to Figure 2.**

545 Neutralization curves of parental CR3022 and eCR3022 antibodies against authentic SARS-CoV-

546 2 (USA-WA1/2020). Each sample was tested in duplicates. Error bars represent standard

547 deviations.

548

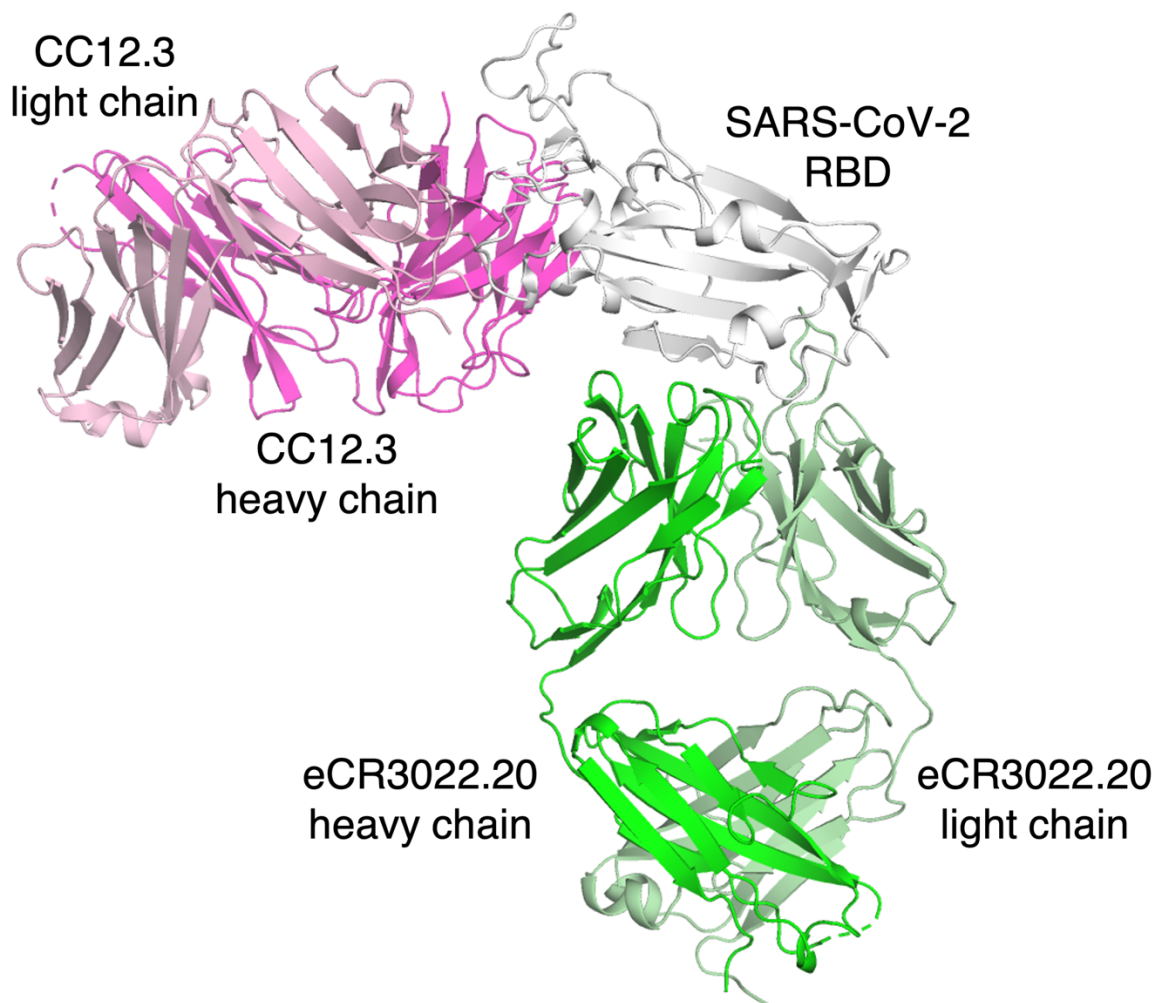

549

550 **Figure S8. Crystal structure of SARS-CoV-2 RBD in complex with Fabs eCR3022.20 and**  
551 **CC12.3. Related to Figure 3.** The binding site of eCR3022.20 (Fab heavy and light chains shown  
552 in green and light green, respectively) on the RBD (white) is distinct from that of CC12.3 (Fab  
553 heavy and light chains shown in magenta and light pink, respectively), which binds to the receptor  
554 binding site.

555



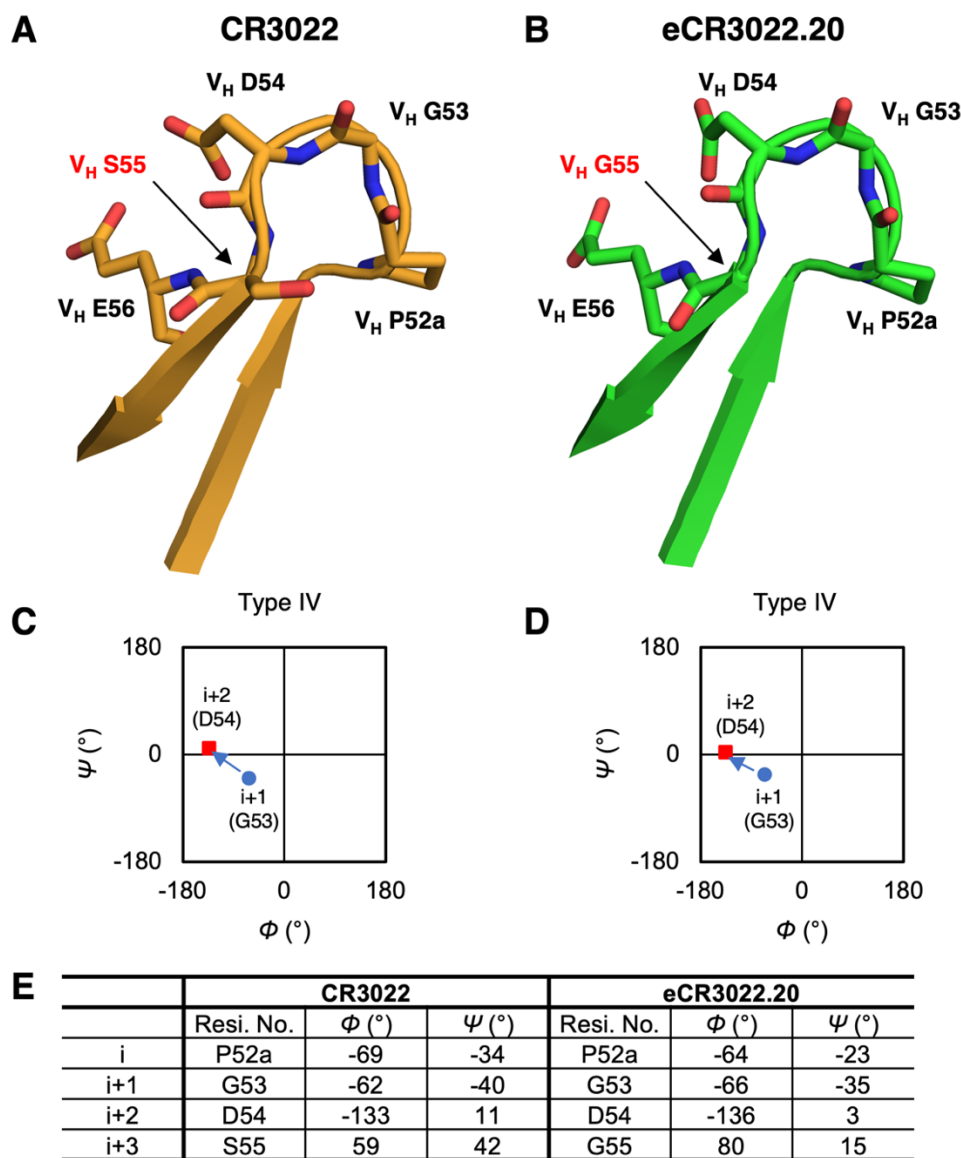

556

557 **Figure S9. CDR H2 of CR3022 and eCR3022.20 form a type IV  $\beta$  turn. Related to Figure 3.**

558 (A-B) Comparison between the H2 CDRs of (A) CR3022 and (B) eCR3022.20. Residues that  
 559 differ are highlighted in red letters. Our previous structure of CR3022 (PDB ID: 6W41) and the  
 560 structure of eCR3022.20 are used for the comparison. (C-D) Ramachandran plots of the H2 CDRs  
 561 of (C) CR3022 and (D) eCR3022.20 indicate type-IV  $\beta$  turns ( $V_H^{52a}PGDS^{55}$ ) for both H2 CDR  
 562 loops are they deviate slightly from a type 1  $\beta$  turn. Phi and psi angles of the residues i+1 (G53)  
 563 and i+2 (D54) are shown as blue circles and red squares, respectively.

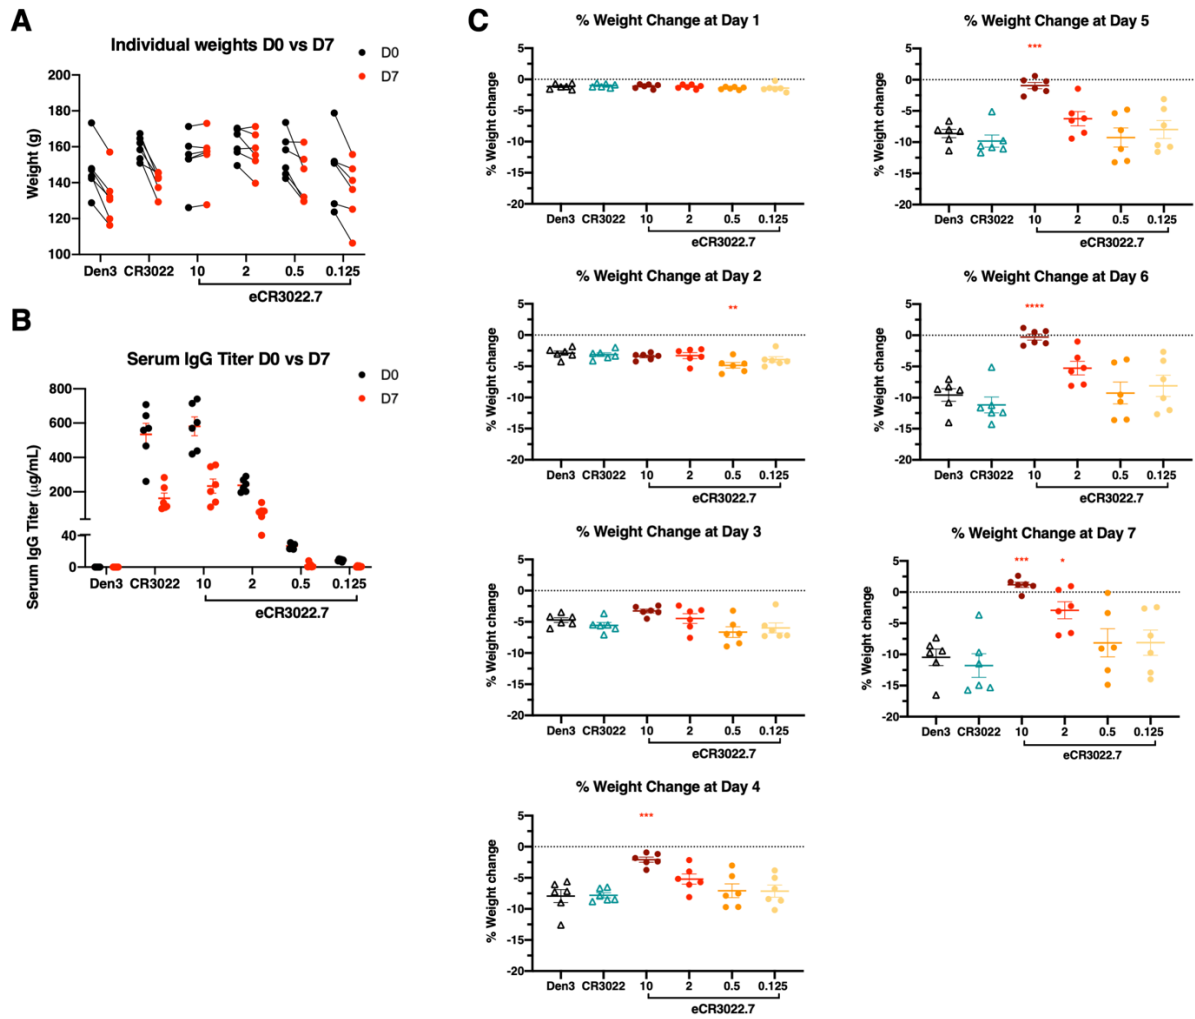

564

565 **Figure S10. Animal protection studies. Related to Figure 4. (A)** Weights of animals at time of  
566 challenge (Day 0) compared to weights at time of sacrifice (Day 7). **(B)** Serum human IgG  
567 concentration at time of infection (Day 0) compared to sacrifice (Day 7). **(C)** Percent weight loss  
568 by day compared to weights recorded at time of infection at day 0.

569

570

571

572

573

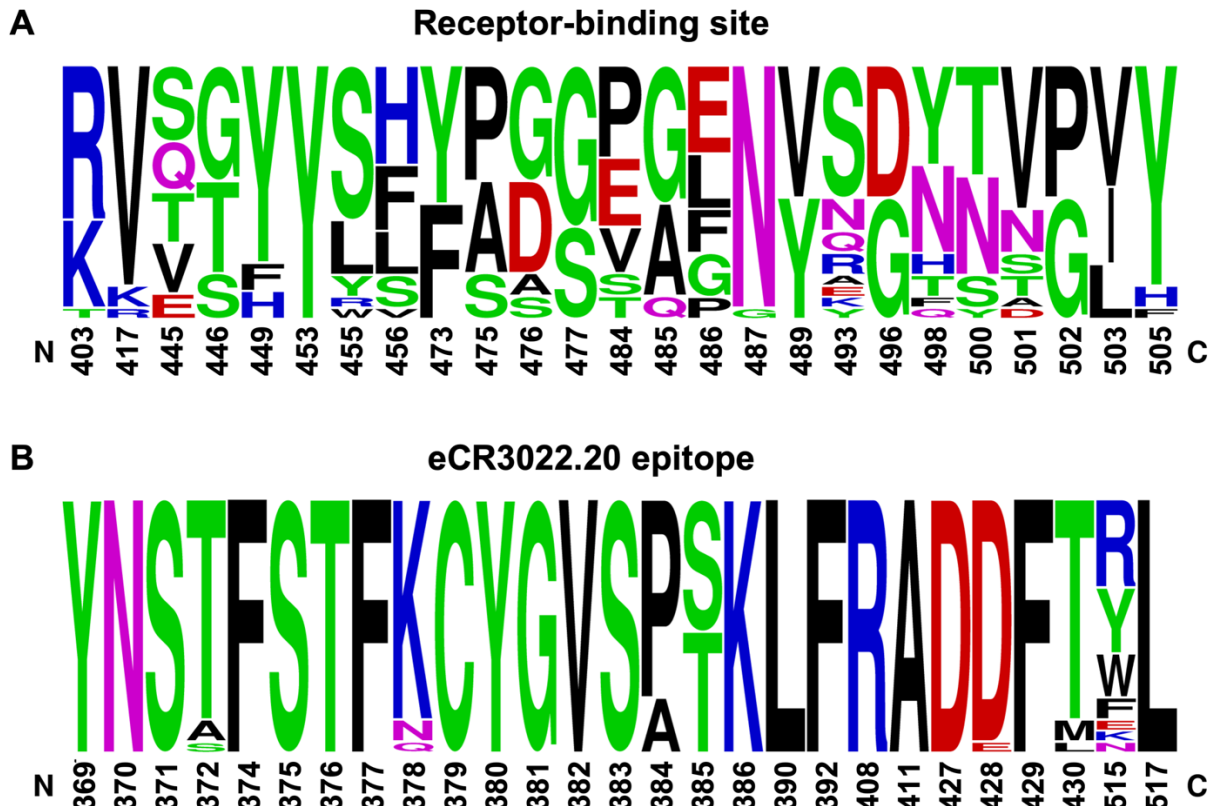

574  
 575 **Figure S11. Sequence conservation of the eCR3022.20 epitope versus the SARS-CoV RBS.**  
 576 Residues that interact with (A) ACE2 and (B) eCR3022.20 (defined by BSA > 0 Å<sup>2</sup>) are shown as  
 577 a sequence logo (Crooks et al., 2004). BSA values are calculated with PISA (Krissinel and  
 578 Henrick, 2007) using the SARS-CoV-2 RBD/ACE2 structure (PDB 6M0J) (Lan et al., 2020) and  
 579 the CR3022.20/RBD structure determined here. Sequences of 22 Sarbecoviruses including  
 580 SARS-CoV-2, SARS-CoV and SARS-related coronaviruses (SARSr-CoVs) were used for this  
 581 analysis: NCBI Reference Sequence YP\_009724390.1 (SARS-CoV-2), GenBank ABF65836.1  
 582 (SARS-CoV), GenBank ALK02457.1 (Bat SARSr-CoV WIV16), GenBank AGZ48828.1 (Bat  
 583 SARSr-CoV WIV1), GenBank ACU31032.1 (Bat SARSr-CoV Rs672), GenBank AIA62320.1 (Bat  
 584 SARSr-CoV GX2013), GenBank AAZ67052.1 (Bat SARSr-CoV Rp3), GenBank AIA62300.1 (Bat  
 585 SARSr-CoV SX2013), GenBank ABD75323.1 (Bat SARSr-CoV Rf1), GenBank AIA62310.1 (Bat  
 586 SARSr-CoV HuB2013), GenBank AAY88866.1 (Bat SARSr-CoV HKU3-1), GenBank AID16716.1  
 587 (Bat SARSr-CoV Longquan-140), GenBank AVP78031.1 (Bat SARSr-CoV ZC45), GenBank  
 588 AVP78042.1 (Bat SARSr-CoV ZXC21), GenBank QHR63300.2 (Bat CoV RaTG13), NCBI  
 589 Reference Sequence YP\_003858584.1 (Bat SARSr-CoV BM48-31), GISAID EPI\_ISL\_410721  
 590 (Pangolin-CoV Guandong2019), GenBank QIA48632.1 (Pangolin-CoV Guangxi), GenBank  
 591 AGZ48806.1 (Bat SARSr-CoV RsSHC0144), GenBank ATO98120.1 (Bat SARSr-CoV Rs4081),

592 GenBank AGC74176.1 (Bat SARSr-CoV Yun11), GenBank APO40579.1 (Bat SARSr-CoV  
593 BtKY72).  
594

## 595 **MATERIALS AND METHODS**

### 596 **Antibody library generation**

597 CR3022 heavy chain and light chain affinity maturation libraries were synthesized by Twist  
598 Bioscience (San Francisco). Mutations were included in the CDR loops, based on the following  
599 definitions: CDRH1 = GYGFITYWI, CDRH2 = IYYPGDSET, CDRH3 = GGSGISTPMDV, CDRL1  
600 = VLYSSINKNYL, CDRL2 = IYWASTRE, CDRL3 = QQYYSTPY. At each position in the CDR  
601 loop, mini libraries were synthesized that encoded all possible single mutations from the starting  
602 sequence, excluding variants where the substitution was to a cysteine or methionine and variants  
603 that created an N-linked glycosylation motif. The CDR1/2/3 mini-libraries were assembled into  
604 combinatorial heavy chain and light chain libraries.

605 The libraries were displayed on the surface of yeast as molecular Fab using the pYDSI vector, a  
606 yeast display vector containing the bidirectional Gal1-10 promoter that was based on the design  
607 of a previously described vector (Wang et al., 2018), omitting the leucine-zipper dimerization  
608 domains. The heavy chain contains a C-terminal V5 epitope tag and the light chain contains a C-  
609 terminal C-myc epitope tag to assess the amount of Fab displayed on the surface of the yeast.  
610 The HC library was generated by cloning the HC CDR1/2/3 library into a vector already containing  
611 the invariant CR3022 light chain by homologous recombination, and the LC library was generated  
612 by doing the inverse. The HC/LC library was generated by amplifying the HC and LC sequences  
613 with primers overlapping in the Gal1-10 promoter. The recovered Gal-HC and Gal-LC fragments  
614 were ligated via Gibson assembly and amplified. The resulting LC-Gal1-10-HC product was  
615 cloned into empty pYDSI by homologous recombination.

616

### 617 **Yeast transformation**

618 Yeast transformation was performed as described previously. In brief, the colony of  
619 *Saccharomyces cerevisiae* YVH10 cells (ATCC, MYA4940) was inoculated in 2mL YPD medium  
620 (Dissolve 20 g dextrose, 20 g peptone and 10 g yeast extract in deionized H<sub>2</sub>O to a volume of 1  
621 liter and sterilize by filtration) and shaken overnight at 30°C. The overnight culture was expanded  
622 in 50 mL YPD medium and shaken at 30°C until the absorbance was around 1.5 at 600 nm. Yeast  
623 cells were spun down and resuspended with 25 mL of 100 mM lithium acetate. 250 µL of 1 M

624 DTT was added to the cells and mixed rapidly. After shaking at 30°C for 10 min, cells were spun  
625 down and washed with 25 mL of pre-chilled deionized H<sub>2</sub>O. After centrifuge, the cell pellet was  
626 suspended with pre-chilled deionized H<sub>2</sub>O to a final volume of 500 µL. After this step, yeast cells  
627 were electrocompetent and ready for transformation.

628 1 µg of linearized vector DNA was mixed with 5 ug of insert library DNA in an Eppendorf tube on  
629 ice. 250 µL of electrocompetent cells were transferred to the tube and incubated for 10 min on  
630 ice. Then the cells and DNA mixture were transferred to cuvette and inserted into Gene Pulser  
631 Xcell Electroporation System (Biorad) using following settings:

632 Square wave

633 Voltage = 500 V

634 Pulse length = 15.0 ms

635 # pulses = 1

636 Pulse interval = 0

637 Cuvette = 2 mm

638 After electrophoresis, cells were shocked by immediately adding 1 mL of pre-warmed YPD  
639 medium. Cells were then transferred to a 50 mL tube for outgrowth. After shaking 200 rpm at  
640 30°C for 1 h, cells were centrifuged and resuspended in synthetic drop-out medium without  
641 tryptophan (with 1 % Penicillin/Streptomycin) and shaken overnight to grow.

642

### 643 **Yeast library labeling and sorting**

644 After yeast transformation, yeast cells were expanded and split once for better display efficiency.  
645 Before staining, cells were induced overnight at 30°C by SGCAA induction medium (dissolve 20  
646 g galactose, 1 g glucose, 6.7 g yeast nitrogen base without amino acid, 5 g bacto casamino acids,  
647 5.4 g Na<sub>2</sub>HPO<sub>4</sub>, 8.56 g NaH<sub>2</sub>PO<sub>4</sub>•H<sub>2</sub>O, 8.56 mg uracil to 1 L deionized water, pH 6.5, and sterilize  
648 by filtration). For each library, in the first round of selection, 5 x 10<sup>7</sup> of yeast cells were stained per  
649 sample. In the second to final round of selection, 1 x 10<sup>7</sup> cells were stained. Yeast cells were  
650 firstly spun down and washed with PBS/1% BSA, then incubated with biotinylated SARS-CoV-2  
651 RBD or S or HEK cell membrane protein at several non-depleting concentrations respectively for  
652 at least 30 min at 4°C. After washing, yeast cells were stained with FITC-conjugated chicken anti-  
653 C-Myc antibody (Immunology Consultants Laboratory, CMYC-45F), AF405-conjugated anti-V5  
654 antibody (made in house), and streptavidin-APC (Invitrogen, SA1005) in 1:100 dilution for 20 min  
655 at 4 °C. After washing, yeast cells were resuspended in 1 mL of PBS/1% BSA and loaded on BD  
656 FACSMelody cell sorter. Top 5-10% of cells with high binding activity to a certain SARS-CoV-2

657 RBD labeling concentration were sorted and spun down. Sorted cells were expanded in 2 mL of  
658 synthetic drop-out medium without tryptophan (Sigma-Aldrich, Y1876-20G) supplemented with  
659 1% Penicillin/Streptomycin (Corning, 30-002-C) at 30°C overnight.

660

### 661 **Deep sequencing and analysis**

662 After each sort, a fragment of cell population was expanded in 2 mL of synthetic drop-out medium  
663 without tryptophan supplemented with 1% Penicillin/Streptomycin overnight at 30°C. Yeast cells  
664 were then spun down, cell pellet was resuspended with 250 µL of buffer P1 (with RNase added)  
665 (Qiagen, 27104) by pipetting up and down. 5 µL of Zymolyase (Zymo Research, E1005) was  
666 added to digest yeast cell walls and incubated at 37°C for 1 h. Cells were then lysed, neutralized,  
667 and DNA was purified according to manufacturer's instructions (Qiagen, 27104). After that,  
668 CR3022 HC and LC fragments from post-sorted plasmid DNA were amplified by following  
669 CR3022-HC and CR3022-LC primer mixture respectively.

670 CR3022.HC-

671 NGSFa:GTCTCGTGGGCTCGGAGATGTGTATAAGAGACAGGAGTCTCTGAAGATCTCCTGT  
672 AAGGG;

673 CR3022.HC-

674 NGSFb:GTCTCGTGGGCTCGGAGATGTGTATAAGAGACAGHHGAGTCTCTGAAGATCTCCT  
675 GTAAGGG;

676 CR3022.HC-

677 NGSFc:GTCTCGTGGGCTCGGAGATGTGTATAAGAGACAGHHHHGAGTCTCTGAAGATCTC  
678 CTGTAAGGG;

679 CR3022.HC-

680 NGSRa:TCGTCGGCAGCGTCAGATGTGTATAAGAGACAGGAGACGGTGACCGTGGTTC;

681 CR3022.HC-

682 NGSRb:TCGTCGGCAGCGTCAGATGTGTATAAGAGACAGHHGAGACGGTGACCGTGGTTC;  
683 CR3022.HC-

684 NGSRc:TCGTCGGCAGCGTCAGATGTGTATAAGAGACAGHHHHGAGACGGTGACCGTGGT  
685 TC;

686 CR3022.LC-

687 NGSFa:GTCTCGTGGGCTCGGAGATGTGTATAAGAGACAGGGAGAAAGAGCCACCATCAAC  
688 TG;

689 CR3022.LC-  
690 NGSFb:GTCTCGTGGGCTCGGAGATGTGTATAAGAGACAGHHGGAGAAAGAGCCACCATCA  
691 ACTG;  
692 CR3022.LC-  
693 NGSFc:GTCTCGTGGGCTCGGAGATGTGTATAAGAGACAGHHHHGGAGAAAGAGCCACCAT  
694 CAACTG;  
695 CR3022.LC-  
696 NGSRa:TCGTCGGCAGCGTCAGATGTGTATAAGAGACAGGATCTCCACCTTGGTCCCTTG;  
697 CR3022.LC-  
698 NGSRb:TCGTCGGCAGCGTCAGATGTGTATAAGAGACAGHHGATCTCCACCTTGGTCCCTT  
699 G;  
700 CR3022.LC-  
701 NGSRc:TCGTCGGCAGCGTCAGATGTGTATAAGAGACAGHHHHGATCTCCACCTTGGTCCC  
702 TTG.

703 1µL of primer mixture (10 µM) were used to amplify the HC and LC DNA respectively after every  
704 round of FACS selection with 2 µL of post-sorted plasmid DNA, 10 µL of 5X Phusion HF buffer,  
705 35.5 µL of H<sub>2</sub>O, and 0.5 µL of Phusion enzyme (ThermoFisher, F530L) using the following PCR  
706 program: 1min at 98°C; 32 cycles of 10 s at 98°C, 15 s at 65°C, 30s at 72°C; followed by 5 min  
707 at 72°C. After PCR clean up, second round of PCR was performed by adding 2 µL of first round  
708 PCR product, 5 µL of 4 µM barcode nextera adapter primer mixture, 0.4 uL of 10mM dNTP, 4 uL  
709 of 5X Phusion HF buffer (ThermoFisher, F518L), 8.4 µL of H<sub>2</sub>O, and 0.2 µL of Phusion enzyme  
710 and using the following PCR program: 1 min at 98°C; 7 cycles of 15 s at 98°C, 15 s at 68°C, 30 s  
711 at 72°C; followed by 5 min at 72°C. After PCR clean up, all the PCR products were combined and  
712 diluted to 15 pM in the final volume of 20 µL. To denature the DNA, 5 µL of the diluted library and  
713 5 µL of freshly-prepared 0.2N NaOH were mixed and incubated at room temperature for 5 min.  
714 Then 990 µL of pre-chilled HyB buffer was added and mixed well. 570 µL of denatured library  
715 DNA and 30 µL of denatured PhiX control library (Illumina, FC-110-3001) were mixed, added into  
716 Miseq Reagent V3 kit (Illumina, MS-102-3003), and finally loaded onto Illumina Miseq Next  
717 Generation sequencer.  
718 Paired FASTQs were checked for sequence quality using the FastQC package (FastQC v0.11.9).  
719 The forward and reverse reads were merged using BBMerge (version 38.87) from the BBTools  
720 suite using standard parameters (Bushnell et al., 2017). Merged reads with full sequence identity  
721 were clustered using VSEARCH (v2.15.1) (Rognes et al., 2016). Clustering was done using the  
722 "cluster\_fast" method and fasta files were written including cluster abundance in the fasta header.

723 A custom python (Python 3.7) script was written to parse the vsearch output, translate the DNA  
724 sequences to amino acid sequences and count the CDR1, CDR2, and CDR3 positions. Using  
725 VSEARCH for clustering prior to translating and parsing the sequences improved performance  
726 substantially.

727

### 728 **Pacbio sequencing**

729 Long Amp Taq Polymerase (New England Biolabs) was used to PCR amplify Plasmid DNA after  
730 sort 4 according to manufacturer's protocol with the following primers:

731 CR3022\_PCR1\_FWD:

732 /5AmMC6/GCAGTCGAACATGTAGCTGACTCAGGTCACCAAACAACAGAAGCAGTCCCA

733 CR3022\_PCR1\_REV:

734 /5AmMC6/TGGATCACTTGTGCAAGCATCACATCGTAGGGAGTTCAGGTGCTGGTGAT.

735

736 First round PCR products were purified with SPRI beads (Beckman Coulter) and 10 uL of purified  
737 PCR product was used in a second round of index PCR with the following primers:

738 bc\_1004\_FWD\_PacB\_Univ.PCR:

739 GGGTCACGCACACACGCGCGgcagtcgaacatgtagctgactcaggtcac

740 bc\_1028\_REV\_PacB\_Univ.PCR:

741 CAGTGAGAGTCAGAGCAGAGTggatcacttgtgcaagcatcacatcgtag

742

743 DNA sample was again purified with SPRI beads, then submitted to GeneWiz, where a PacBio  
744 SMRTbell amplicon library was prepared per the manufacturer's protocol and sequenced on the  
745 PacBio Sequel platform with v3.0 chemistry. The generated subreads were demultiplexed and  
746 circular consensus sequence (CCS) reads were obtained using the CCS algorithm within PacBio  
747 ccs v4.2.0. The algorithm was run using the default parameters. A custom python (Python 3.7)  
748 script was written to parse the CCS fastq output, translate the DNA sequences to amino acid  
749 sequences and count the CDR1, CDR2, and CDR3 positions.

750

751 Sequence data that support the findings in this study are available at the NCBI Sequencing Read  
752 Archive ([www.ncbi.nlm.nih.gov/sra](http://www.ncbi.nlm.nih.gov/sra)) under BioProject number PRJNAXXXXXX. Python code will  
753 be available on github.

754

### 755 **Recombinant S and RBD production**



756 SARS-CoV-1 (Genbank AAP13567) or SARS-CoV-2 (Genbank MN908947) S and RBD proteins  
757 were transiently expressed in Freestyle 293F system (ThermoFisher). In brief, S or RBD  
758 expression plasmids were cotransfected with 40K PEI (1 mg/mL) at a ratio of 1:3. After incubation  
759 for 30 min at RT, transfection mixture was added to Freestyle 293F cells at a density of  
760 approximately 1 million cells/mL. After 5 days, supernatants were harvested and filtered with a  
761 0.22 µm membrane. The His-tagged proteins were purified with the HisPur Ni-NTA Resin (Thermo  
762 Fisher, 88222). After three columns of washing with 25 mM Imidazole (pH 7.4), proteins were  
763 eluted with an elution buffer (250 mM Imidazole, pH 7.4) at slow gravity speed (~4 sec/drop).  
764 Eluted proteins were buffer exchanged and concentrated with PBS using Amicon tubes  
765 (Millipore). The proteins were further purified by size exclusion chromatography (SEC) using  
766 Superdex 200 (GE Healthcare). The selected fractions were pooled and concentrated again for  
767 further use.

768

#### 769 **Antibody production and purification**

770 Monoclonal antibody was transiently expressed in the Expi293 system (ThermoFisher, A14635).  
771 In brief, antibody HC and LC plasmids were co-transfected at a ratio of 1:2.5 with transfection  
772 reagent FectoPRO (Polyplus 116-010). After 24 h of transfection, 300 mM of sterile sodium  
773 valproic acid solution (Sigma-Aldrich, P4543) and 45% D-(+)- glucose solution (Sigma Aldrich,  
774 G8769-100ML) were added to feed cells. After 4-5 days of transfection, supernatants were  
775 collected, sterile-filtered (0.22 µm), and IgG was purified with Protein A sepharose beads (GE  
776 Healthcare 17-5280-04).

777

#### 778 **Pseudovirus neutralization assay**

779 Pseudovirus was generated as described previously<sup>2</sup>. In brief, 12.5 µg of MLV gag/pol backbone  
780 (Addgene, 14887), 10 µg of MLV-CMV-Luciferase plasmid, and 2.5 µg of SARS-CoV-2-d18 spike  
781 plasmid were incubated with transfection reagent Lipofectamine 2000 (Thermo Fisher, 11668027)  
782 following manufacturer's instructions for 20 min at RT. Then the mixture was transferred onto HEK  
783 293T cells (ATCC, CRL-3216) in a 10 cm<sup>2</sup> culture dish (Corning, 430293). After 12-16 h of  
784 transfection, culture medium was gently removed, fresh DMEM medium was added onto the  
785 culture dish. Supernatants containing pseudovirus were harvested after 48 h post transfection  
786 and frozen at -80 °C for long term storage.

787 In the neutralization assay, antibody samples were serially diluted with complete DMEM medium  
788 (Corning, 15-013-CV) containing 10% FBS (Omega Scientific, FB-02), 2 mM L-Glutamine  
789 (Corning, 25-005-CI), and 100 U/mL of Penicillin/Streptomycin (Corning, 30-002-C). 25 µL/well of

790 diluted samples were then incubated with 25  $\mu$ L/well of pseudotyped virus for 1 h at 37 °C in 96-  
791 well half-area plates (Corning, 3688). After that, 50  $\mu$ L of Hela-hACE2 cells were added at 10,000  
792 cells/well onto each well of the plates. After 48 h of incubation, cell culture medium was removed,  
793 luciferase lysis buffer (25 mM Gly-Gly pH 7.8, 15 mM MgSO<sub>4</sub>, 4 mM EGTA, 1% Triton X-100)  
794 was added onto cells. Luciferase activity was measured by BrightGlo substrate (Promega, PR-  
795 E2620) according to the manufacturer's instructions. mAbs were tested in duplicate wells and  
796 independently repeated at least twice. Neutralization IC<sub>50</sub> values were calculated using "One-Site  
797 Fit LogIC<sub>50</sub>" regression in GraphPad Prism 8.0.

798

### 799 **Authentic SARS-CoV-2 neutralization assay**

800 Vero E6 cells were seeded in 96-well half-well plates at approximately 8000 cells/well in a total  
801 volume of 50  $\mu$ L complete DMEM medium the day prior to the addition antibody and virus mixture.  
802 The virus (500 plaque forming units/well) and antibodies were mixed, incubated for 30 minutes  
803 and added to the cells. The transduced cells were incubated at 37°C for 24 hours. Each treatment  
804 was tested in duplicate. The medium was removed and disposed of appropriately. Cells were  
805 fixed by immersing the plate into 4% formaldehyde for 1 hour before washing 3 times with  
806 phosphate buffered saline (PBS). The plate was then either stored at 4°C or gently shaken for 30  
807 minutes with 100  $\mu$ L/well of permeabilization buffer (PBS with 1% Triton-X). All solutions were  
808 removed, then 100  $\mu$ l of 3% bovine serum albumin (BSA) was added, followed by room  
809 temperature (RT) incubation at 2 hours.

810 Primary antibodies against the spike protein were generated from a high-throughput process that  
811 screened a convalescent, coronavirus disease 2019 cohort (CC)<sup>2</sup>. A mix of primary antibodies  
812 consisting of CC6.29, CC6.33, CC6.36, CC12.23, CC12.25, in a 1:1 ratio, were used next. The  
813 primary antibody mixture was diluted in PBS/1% BSA to a final concentration of 2  $\mu$ g/ml. The  
814 blocking solution was removed and washed thoroughly with wash buffer (PBS with 0.1% Tween-  
815 20). The primary antibody mixture, 50  $\mu$ l/well, was incubated with the cells for 2 hours at RT. The  
816 plates were washed 3 times with wash buffer.

817 Peroxidase AffiniPure Goat Anti-Human IgG (H+L) secondary antibody (Jackson  
818 ImmunoResearch, 109-035-088) diluted to 0.5  $\mu$ g/mL in PBS/1% BSA was added at 50  $\mu$ L/well  
819 and incubated for 2 hours at RT. The plates were washed 6 times with wash buffer. HRP substrate  
820 (Roche, 11582950001) was freshly prepared as follows: Solution A was added to Solution B in a  
821 100:1 ratio and stirred for 15 minutes at RT. The substrate was added at 50  $\mu$ L/well and  
822 chemiluminescence was measured in a microplate luminescence reader (BioTek, Synergy 2).

823 The following method was used to calculate the percentage neutralization of SARS-CoV-2. First,  
824 we plotted a standard curve of serially diluted virus (3000, 1000, 333, 111, 37, 12, 4, 1 PFU)  
825 versus RLU using four-parameter logistic regression (GraphPad Prism 8.0) below:

$$y = a + \frac{b - a}{1 + \left(\frac{x}{x_0}\right)^c}$$

826  
827 (y: RLU, x: PFU, a,b,c and x<sub>0</sub> are parameters fitted by standard curve)

828 To convert sample RLU into PFU, use the equation below: (if y < a then x = 0)

$$x = x_0 \log_c \frac{b - y}{y - a}$$

829  
830 Percentage neutralization was calculated by the following equation:

$$\% \text{Neut} = 100 \times \frac{\text{VC} - \text{nAb}}{\text{VC} - \text{CC}}$$

831  
832 VC = Average of vehicle-treated control; CC = Average of cell only control, nAb, neutralizing  
833 antibody. PFU value was used for each variable indicated.

834  
835 To compute neutralization IC<sub>50</sub>, logistic regression (sigmoidal) curves were fit using GraphPad  
836 Prism. Means and standard deviations are displayed in the curve fit graphs and were also  
837 calculated using GraphPad Prism 8.0.

### 838 839 **Recombinant protein ELISAs**

840 6x-His tag antibodies were coated at 2 ug/mL in PBS onto 96-well half-area high binding plates  
841 (Corning, 3690) overnight at 4°C or 2 h at 37°C. After washing, plates were blocked with 3% BSA  
842 for 1 h at RT. Then 1 ug/mL of his tagged recombinant SARS-CoV-2 (or SARS-CoV-1) RBD or S  
843 proteins were added in plates and incubated for 1 h at RT. After washing, serially diluted  
844 antibodies were added in plates and incubated for 1 h at RT. After washing, alkaline phosphatase-  
845 conjugated goat anti-human IgG Fcγ secondary antibody (Jackson ImmunoResearch, 109-055-  
846 008) was added in 1:1000 dilution and incubated for 1 h at RT. After final wash, phosphatase  
847 substrate (Sigma-Aldrich, S0942-200TAB) was added into each well. Absorption was measured  
848 at 405 nm.

### 849 850 **Polyspecificity reagent (PSR) ELISAs**

851 Solubilized CHO cell membrane protein (SMP), human insulin (Sigma-Aldrich, I2643), single  
852 strand DNA (Sigma-Aldrich, D8899) were coated onto 96-well half-area high-binding ELISA plates  
853 (Corning, 3690) at 5 ug/mL in PBS overnight at 4°C. After washing, plates were blocked with  
854 PBS/3% BSA for 1 h at RT. Antibody samples were diluted at 100 ug/mL in 1% BSA with 5-fold  
855 serial dilution. Serially diluted samples were then added in plates and incubated for 1 h at RT.  
856 After washing, alkaline phosphatase-conjugated goat anti-human IgG Fc $\gamma$  secondary antibody  
857 (Jackson ImmunoResearch, 109-055-008) was added in 1:1000 dilution and incubated for 1h at  
858 RT. After final wash, phosphatase substrate (Sigma-Aldrich, S0942-200TAB) was added into  
859 each well. Absorption was measured at 405 nm.

860

### 861 **HEp2 epithelial cell polyreactive assay**

862 Reactivity to human epithelial type 2 (HEp2) cells was determined by indirect  
863 immunofluorescence on HEp2 slides (Hemagen, 902360) according to manufacturer's  
864 instructions. In brief, monoclonal antibody was diluted at 100 ug/mL in PBS and then incubated  
865 onto immobilized HEp2 slides for 30 min at RT. After washing, one drop of FITC-conjugated goat  
866 anti-human IgG was added onto each well and incubated in the dark for 30 min at RT. After  
867 washing, cover slide was added to HEp2 cells with glycerol and the slide was photographed on a  
868 Nikon fluorescence microscope to detect GFP. All panels were shown at magnification 40x.

869

### 870 **Surface plasmon resonance methods**

871 SPR measurements were carried out on a Biacore 8K instrument at 25°C. All experiments were  
872 carried out with a flow rate of 30  $\mu$ L/min in a mobile phase of HBS-EP [0.01 M HEPES (pH 7.4),  
873 0.15 M NaCl, 3 mM EDTA, 0.0005% (v/v) Surfactant P20]. Anti-Human IgG (Fc) antibody (Cytiva)  
874 was immobilized to a density ~7000-10000 RU via standard NHS/EDC coupling to a Series S  
875 CM-5 (Cytiva) sensor chip. A reference surface was generated through the same method.

876 For conventional kinetic/dose-response, listed antibodies were captured to 50-100 RU via Fc-  
877 capture on the active flow cell prior to analyte injection. A concentration series of SARS-CoV-2  
878 RBD was injected across the antibody and control surface for 2 min, followed by a 5 min  
879 dissociation phase using a multi-cycle method. Regeneration of the surface in between injections  
880 of SARS-CoV-2 RBD was achieved by a single, 120s injection of 3M MgCl<sub>2</sub>. Kinetic analysis of  
881 each reference subtracted injection series was performed using the BIAEvaluation software  
882 (Cytiva). All sensorgram series were fit to a 1:1 (Langmuir) binding model of interaction.

## 883 **Expression and purification of Fab**

884 The CC12.3 Fab was expressed and purified using a previous protocol (Yuan et al., 2020b). In  
885 brief, the heavy and light chains were cloned into pHCMV3. The plasmids were transiently co-  
886 transfected into ExpiCHO cells at a ratio of 2:1 (HC:LC) using ExpiFectamine™ CHO Reagent  
887 (Thermo Fisher Scientific) according to the manufacturer's instructions. The supernatant was  
888 collected at 10 days post-transfection. The Fabs were purified with a CaptureSelect™ CH1-XL  
889 Affinity Matrix (Thermo Fisher Scientific) followed by size exclusion chromatography. The  
890 eCR3022.20 Fab was purified by digesting eCR3022.20 IgG using Fab digestion kit  
891 (ThermoFisher, 44985) according to manufacturer's instructions. After digestion, Fc fragments  
892 and undigested IgG were removed from binding to the protein A beads. The unbound flowthrough  
893 Fab was collected and followed by size exclusion chromatography.

894

## 895 **Crystal structure determination of the eCR3022.20-RBD-CC12.3 complex**

896 Purified eCR3022.20 Fab, CC12.3 Fab, and SARS-CoV-2 RBD were mixed at an equimolar ratio  
897 and incubated overnight at 4°C. The complex (12 mg/ml) was screened for crystallization using  
898 the 384 conditions of the JCSG Core Suite (Qiagen) on our custom-designed robotic  
899 CrystalMation system (Rigaku) at Scripps Research by the vapor diffusion method in sitting drops  
900 containing 0.1 µl of protein and 0.1 µl of reservoir solution. Optimized crystals were then grown in  
901 0.1 M sodium citrate - citric acid buffer pH 5.0, 15% (v/v) ethylene glycol, 1 M lithium chloride, and  
902 10% (w/v) polyethylene glycol 6000 at 20°C. Crystals were grown for 7 days and then flash cooled  
903 in liquid nitrogen. Diffraction data were collected at cryogenic temperature (100 K) at the Stanford  
904 Synchrotron Radiation Lightsource (SSRL) on the Scripps/Stanford beamline 12-1 with a  
905 wavelength of 0.97946 Å, and processed with HKL2000 (Otwinowski and Minor, 1997). Structures  
906 were solved by molecular replacement using PHASER (McCoy et al., 2007) with PDB 6XC7 (Yuan  
907 et al., 2020b). Iterative model building and refinement were carried out in COOT (Emsley et al.,  
908 2010) and PHENIX (Adams et al., 2010), respectively.

909

## 910 **Data availability**

911 Crystal structure data and coordinates will be deposited in the PDB prior to publication.

## 912 **Animal study**

913 Groups of twelve 6-8 week old Syrian hamsters were put into 6 treatment groups who each  
914 received an intraperitoneal (i.p.) infusion of either 10 mg, 2 mg, 0.5 mg, or 0.125 mg per animal  
915 of the eCR3022.7 monoclonal antibody or 10 mg per animal of the parental CR3022 monoclonal

916 antibody or 10 mg per animal of an anti-dengue isotype matched control antibody (Den3). After  
917 72 hours, serum was obtained to quantify mAb titers prior to animal infection. Each hamster was  
918 then infected through intranasal administration of  $10^5$  total PFU (plaque forming units) of SARS-  
919 CoV-2 (USA-WA1/2020). Animal weights were obtained during the study as a measure of disease  
920 progression. On day four post infection, six of the animals were sacrificed and lung tissue was  
921 harvested for viral titer analysis by RT-qPCR as well as live viral titers via plaque assay. At day  
922 seven post-infection, six of the animals were sacrificed and serum was collected to assess mAb  
923 titer at the time of sacrifice using our recombinant protein ELISA protocol. Research protocol was  
924 approved and performed in accordance with Scripps Research IACUC Protocol #20-0003.

### 925 **Viral load measurements - Plaque Assay**

926 SARS-CoV-2 titers were measured by homogenizing lung tissue in DMEM 2% FCS using 100  $\mu$ m  
927 cell strainers (Myriad, 2825-8367). Homogenized organs were titrated 1:10 over 6 steps and  
928 layered over Vero-E6 cells. After 1 h of incubation at 37°C, a 1% methylcellulose in DMEM overlay  
929 was added, and the cells were incubated for 3 days at 37°C. Cells were fixed with 4% PFA and  
930 plaques were counted by crystal violet staining.

### 931 **Statistical methods**

932 Statistical analysis was performed using Graph Pad Prism 8 for Mac, Graph Pad Software, San  
933 Diego, California, USA. Groups of data were compared using several methods including the  
934 grouped parametric One-Way ANOVA test and the grouped non-parametric Kruskal-Wallis test.  
935 Data were considered statistically significant at  $p < 0.05$ .
